1 The transcription factor Roc1 is a regulator of cellulose degradation in the wood-  
2 decaying mushroom *Schizophyllum commune*

3

4 Ioana M. Marian<sup>1</sup>, Peter Jan Vonk<sup>1</sup>, Ivan D. Valdes<sup>1</sup>, Kerrie Barry<sup>2</sup>, Benedict Bostock<sup>1</sup>, Akiko Carver<sup>2</sup>,  
5 Chris Daum<sup>2</sup>, Harry Lerner<sup>1</sup>, Anna Lipzen<sup>2</sup>, Hongjae Park<sup>2,3+</sup>, Margo B. P. Schuller<sup>1</sup>, Martin Tegelaar<sup>1</sup>,  
6 Andrew Tritt<sup>2</sup>, Jeremy Schmutz<sup>2,4</sup>, Jane Grimwood<sup>2,4</sup>, Luis G. Lugones<sup>1</sup>, In-Geol Choi<sup>2,3</sup>, Han A. B.  
7 Wösten<sup>1</sup>, Igor V. Grigoriev<sup>2,5</sup>, Robin A. Ohm<sup>1,2\*</sup>

8

9

- 10 1. Microbiology, Department of Biology, Faculty of Science, Utrecht University, Padualaan 8, 3584  
11 CH, Utrecht, The Netherlands
- 12 2. U.S. Department of Energy Joint Genome Institute, Lawrence Berkeley National Laboratory,  
13 Berkeley, CA 94720, USA
- 14 3. Department of Biotechnology, College of Life Sciences and Biotechnology and Graduate  
15 School, Korea University, Seoul, 02841, South Korea
- 16 4. HudsonAlpha Institute for Biotechnology, Huntsville, AL 35806, USA.
- 17 5. Department of Plant and Microbial Biology, University of California, Berkeley, CA 94720, USA

18

19 + Current address: Institute of Hydrobiology, Biology Centre of the Czech Academy of Sciences, České  
20 Budějovice, Czech Republic

21

22 \* Corresponding author: [r.a.ohm@uu.nl](mailto:r.a.ohm@uu.nl)

23

24

25

26

## 27 **ABSTRACT**

28 Wood-decaying fungi of the class Agaricomycetes (phylum Basidiomycota) are saprotrophs that break  
29 down lignocellulose and play an important role in the nutrient recycling. They secrete a wide range of  
30 extracellular plant cell wall degrading enzymes that break down cellulose, hemicellulose and lignin, the  
31 main building blocks of plant biomass. Although the production of these enzymes is regulated mainly  
32 at the transcriptional level, no activating regulators have been identified in any wood-decaying fungus  
33 in the class Agaricomycetes. We studied the regulation of cellulase expression in the wood-decaying  
34 fungus *Schizophyllum commune*. Comparative genomics and transcriptomics on two wild isolates  
35 revealed a Zn<sub>2</sub>Cys<sub>6</sub>-type transcription factor gene (*roc1*) that was highly up-regulated during growth on  
36 cellulose, when compared to glucose. It is only conserved in the class Agaricomycetes. A *roc1* knockout  
37 strain showed an inability to grow on medium with cellulose as sole carbon source, and growth on  
38 cellobiose and xylan (other components of wood) was inhibited. Growth on non-wood-related carbon  
39 sources was not inhibited. Cellulase activity was reduced in the growth medium of the  $\Delta roc1$  strain.  
40 ChIP-Seq identified 1474 binding sites of the Roc1 transcription factor. Promoters of genes involved in  
41 lignocellulose degradation were enriched with these binding sites, especially those of LPMO (lytic  
42 polysaccharide monooxygenase) CAZymes, indicating that Roc1 directly regulates these genes. A GC-  
43 rich motif was identified as the binding site of Roc1, which was confirmed by a functional promoter  
44 analysis. Together, Roc1 is a key regulator of cellulose degradation and the first identified in wood-  
45 decaying fungi in the phylum Basidiomycota.

46

47

## 48 **INTRODUCTION**

49 Plants store a considerable amount of energy in lignocellulose, and for that reason wood has been used  
50 as a fuel since prehistoric times. Wood is recalcitrant to decay by most organisms, but fungi have  
51 evolved ways to degrade part of the lignocellulose into its monomeric constituents. Most wood decay  
52 fungi belong to the phylum Basidiomycota, or, more specifically, the class Agaricomycetes.  
53 Phylogenetically these are distantly related to the fungi in the phylum Ascomycota such as  
54 *Saccharomyces cerevisiae* and *Neurospora crassa*. The last common ancestor of ascomycete and  
55 basidiomycete fungi is estimated to have lived over 600 million years ago<sup>1</sup>. Although the Ascomycota  
56 harbour potent lignocellulose-degrading fungi, the strongest wood-decaying fungi are found in the  
57 Basidiomycota.

58 Lignocellulose consists of a wide range of components, including cellulose, hemicellulose,  
59 pectin, and the aromatic polymer lignin. These polymers are found in the plant cell wall. Fungi can  
60 generally easily absorb glucose and other monomers from the growth medium, but lignocellulose  
61 requires extensive extracellular enzymatic degradation before the breakdown product can be  
62 transported into the cells and metabolized. Wood-degrading fungi have evolved a broad range of  
63 hydrolytic enzymes that break down the various components of lignocellulose, including cellulases,  
64 hemicellulases, pectinases and oxidative enzymes. Collectively, these plant cell wall degrading  
65 enzymes are known as carbohydrate-active enzymes (CAZymes) and are classified into families of  
66 Glycoside Hydrolases (GHs), Glycosyl Transferases (GTs), Polysaccharide Lyases (PLs),

67 Carbohydrate Esterases (CEs), and Auxiliary Activities (AAs)<sup>2,3</sup>. A typical genome of a wood-degrading  
68 fungus encodes hundreds of CAZymes<sup>4-6</sup>.

69 Basidiomycete wood decayers can be broadly divided into white rot fungi, which degrade all  
70 components of the plant cell wall, and brown rot fungi, which depolymerize cellulose, but leave lignin  
71 largely unmodified. However, fungi that show (genotypic and phenotypic) characteristics of both white  
72 rot and brown rot fungi have also been identified<sup>4</sup>. Neither white rot fungi nor brown rot fungi form  
73 monophyletic groups, and the brown rot lifestyle has evolved several times from white rot fungi<sup>1,4,7</sup>.

74 Genes that encode CAZymes are generally strictly regulated at the transcriptional level, since  
75 their production is energetically expensive and not always needed. The primary mechanism of  
76 regulation is carbon catabolite repression (CCR). CCR represses the production of ligninolytic enzymes  
77 in the presence of an easily metabolizable carbon source, such as glucose, and ensures that the  
78 organism pursues the most energy-efficient mode of growth by ideal resource utilization. CCR is  
79 regulated by a highly conserved zinc-finger transcription factor (*CreA/Cre1/Cre-1*)<sup>8-10</sup>, which functions  
80 as a strong inhibitor of gene expression in the presence of simple sugars and has been described in  
81 several ascomycetes. The gene is conserved in basidiomycetes<sup>10</sup> and it indeed plays the same role in  
82 the mushroom-forming white rot *Pleurotus ostreatus*<sup>11</sup>.

83 A wide range of transcription factors act downstream of CCR (i.e. in the absence of simple  
84 sugars). Generally, these transcription factors activate gene expression of CAZymes involved in the  
85 breakdown of specific polysaccharides. Examples include *xlnR*, *CLR-1*, *CLR-2* and *ACE1*. In  
86 *Aspergillus*<sup>12</sup> and *Trichoderma*<sup>13</sup> the transcription factor *xlnR* regulates (hemi)cellulose degrading  
87 enzymes and it has an ortholog in almost all filamentous ascomycetes<sup>14</sup>. In *N. crassa* the transcription  
88 factors *CLR-1* and *CLR-2* induce the expression of cellulolytic, but not the hemicellulolytic enzymes<sup>15</sup>.  
89 In contrast to the aforementioned regulators, *ACE1* is a repressor of cellulolytic and xylanolytic enzyme  
90 production in *Trichoderma reesei*<sup>16</sup>. It is important to note that these regulators have only been identified  
91 in ascomycete fungi, and that there are no orthologs in basidiomycete fungi<sup>10</sup>. To date, no regulators  
92 have been identified in the wood-degrading basidiomycetes that positively regulate CAZymes. In  
93 general, very little is known about the regulatory mechanisms involved in plant biomass degradation in  
94 the basidiomycetes.

95 *Schizophyllum commune* is a model system for mushroom-forming fungi in the class  
96 Agaricomycetes. Several molecular tools have been developed for this organism, including an efficient  
97 gene deletion protocol<sup>17,18</sup> and a ChIP-Seq protocol for Histone H3 to study the epigenetic landscape<sup>19</sup>.  
98 *S. commune* has a wide geographical distribution and is generally found as white fruiting bodies growing  
99 on wood. Its mode of wood decay is atypical, since it is not easily classified as either white rot or brown  
100 rot<sup>4,6,20</sup>. *S. commune* lacks lignin-degrading peroxidases, limiting its ability to degrade lignin<sup>21</sup>. Still, *S.*  
101 *commune* degrades all wood components, but leaves the middle lamella of the plant cell wall mostly  
102 intact<sup>20</sup>.

103 Here, we describe the identification of a regulator of cellulase expression (*Roc1*) by  
104 comparative genomics and comparative transcriptomics. A deletion strain was unable to efficiently  
105 utilize cellulose as a carbon source, and growth was inhibited on other components of wood. Moreover,  
106 with ChIP-Seq we identified the binding sites of this transcription factor, which were enriched near

107 CAZymes involved in cellulose degradation. This is the first positive regulator of cellulase expression  
108 identified in basidiomycetes.

109

110

111

## 112 **MATERIALS AND METHODS**

113

### 114 **Strains, media composition and culture conditions**

115 The reference strains used in this study were *Schizophyllum commune* H4-8 (*matA43matB41*; FGSC  
116 9210) and the compatible isogenic strain H4-8b (*matA41matB43*)<sup>21</sup>. Strain  $\Delta ku80$  was derived from  
117 H4-8 and was used for gene deletion<sup>18</sup>. The dikaryotic strains *S. commune* Tattone and *S. commune*  
118 Loenen were collected in Tattone (Corsica, France) and Loenen aan de Vecht (The Netherlands),  
119 respectively. The monokaryotic strains *S. commune* TattoneD and *S. commune* LoenenD were  
120 isolated from these strains by protoplasting. Protoplasting was performed using a *Trichoderma*  
121 *harzianum* Horst lytic enzyme mix as described previously<sup>22</sup>.

122 The strains were grown at 30°C on a medium comprising (per L): 22 g glucose  
123 monohydrate, 1.32 g (NH<sub>4</sub>)<sub>2</sub>SO<sub>4</sub>, 0.5 g MgSO<sub>4</sub>·7H<sub>2</sub>O, 0.12 g thiamine, 1 g K<sub>2</sub>HPO<sub>4</sub>, 0.46 g KH<sub>2</sub>PO<sub>4</sub>, 5  
124 mg FeCl<sub>3</sub>·6H<sub>2</sub>O, trace elements and with or without 1.5% agar<sup>23</sup>. For cultures with other carbon  
125 sources, glucose was replaced with 1% (w/v) Avicel (cellulose), 1% (w/v) glucose + 1% (w/v) Avicel,  
126 1% (w/v) cellobiose, 1% (w/v) xylan from corncob, 1% (w/v) pectin from apple, 1% (w/v) starch from  
127 potato, 2.2% (w/v) xylose, 2.2% (w/v) maltose monohydrate. To improve the visualization of the  
128 fungal colonies growing on Avicel, the media was supplemented with 20 µg µl<sup>-1</sup> Remazol Brilliant Blue  
129 R. Liquid cultures were grown in Erlenmeyer flasks at 30°C with shaking at 200 rpm.

130 For selection on nourseothricin (Bio-Connect, Netherlands), phleomycin (Bio-Connect,  
131 Netherlands) or hygromycin (Bio-Connect, Netherlands), the media was supplemented with 15 µg  
132 ml<sup>-1</sup>, 25 µg ml<sup>-1</sup> and 20 µg ml<sup>-1</sup> antibiotic, respectively.

133

### 134 **Genome sequencing and assembly**

135 To perform genome improvement on assembly version Schco1 of *S. commune* H4-8<sup>21</sup>, the whole  
136 genome shotgun assembly was broken down into scaffolds and each scaffold piece was reassembled  
137 with phrap and subsequently improved using our Phred/Phrap/Consed pipeline<sup>24,25</sup>. Initially all low-  
138 quality regions and gaps were targeted with computationally selected Sanger sequencing reactions  
139 completed with 4:1 BigDye terminator: dGTP chemistry (Applied Biosystems). These automated rounds  
140 included walking on 3 kb and 8 kb plasmid subclones and fosmid clones using custom primers (400,  
141 3498 and 1183 primers were selected respectively). Following completion of the automated rounds, a  
142 trained finisher manually inspected each assembly. Further reactions were then manually selected to  
143 improve the genome. Remaining gaps and hairpin structures were resolved by generating small insert  
144 shatter libraries of 8 kb-spanning clones. Smaller repeats in the sequence were resolved by transposon-  
145 hopping and sequencing 8 kb plasmid clones. 136 fosmid clones were shotgun sequenced and finished

146 to fill large gaps and resolve larger repeats. All these sequencing reactions were generated using  
147 Sanger long-read technology.

148 The genomes of *S. commune* TattoneD and LoenenD were sequenced using 270 bp insert  
149 standard fragment Illumina libraries in 2x150 format. The resulting reads were filtered for artifact and  
150 process contamination and were subsequently assembled with Velvet<sup>26</sup>. The resulting assembly was  
151 used to create *in silico* long mate-pair library with insert 3000 +/- 300 bp, which was then assembled  
152 together with the original Illumina library with AllPathsLG release version R42328<sup>27</sup>.

153

#### 154 **Gene prediction and functional annotation**

155 The genomes were annotated using the JGI Annotation Pipeline<sup>28,29</sup>, which combines several gene  
156 prediction and annotation methods, and integrates the annotated genome into the web-based fungal  
157 resource MycoCosm<sup>29</sup>. Before gene prediction, repetitive sequences in the assemblies were masked  
158 using RepeatMasker<sup>30</sup>, RepBase library<sup>31</sup>, and the most frequent (>150 times) repeats were recognized  
159 by RepeatScout<sup>32</sup>. The following combination of gene predictors was run on the masked assembly: ab  
160 initio Fgenesh<sup>33</sup> and GeneMark<sup>34</sup>; homology-based Fgenesh+<sup>33</sup> and Genewise<sup>35</sup> seeded by BLASTx  
161 alignments against the NCBI NR database. RNA-Seq data (see below) was used during gene prediction  
162 for strains H4-8 and TattoneD, but not for LoenenD. In addition to protein-coding genes, tRNAs were  
163 predicted using tRNAscan-SE<sup>36</sup>.

164 The predicted proteins of the three assemblies were functionally annotated. PFAM version  
165 32 was used to predict conserved protein domains<sup>37</sup> and these were subsequently mapped to their  
166 corresponding gene ontology (GO) terms<sup>38,39</sup>. Secretion signals were predicted with Signalp 4.1<sup>40</sup> and  
167 transmembrane domains were predicted with TMHMM 2.0c<sup>41</sup>. Proteins were considered small secreted  
168 proteins when they had a secretion signal, but no transmembrane domain (except in the first 40 amino  
169 acids) and were shorter than 300 amino acids. Transcription factors were identified based on the  
170 presence of a PFAM domain with DNA binding properties<sup>42</sup>. Proteases were predicted based on the  
171 MEROPS database<sup>43</sup> using a BlastP E-value cutoff of 1e-5. A pipeline based on the SMURF method<sup>44</sup>  
172 was used to predict genes and gene clusters involved in secondary metabolism. SMURF parameter d  
173 (maximum intergenic distance in base pairs) was set at 3000 bp. SMURF parameter y (the maximum  
174 number of non-secondary metabolism genes upstream or downstream of the backbone gene) was set  
175 at 6. CAZymes were annotated with the standalone version of the dbCAN pipeline using HMMdb version  
176 9<sup>45</sup>.

177 The assemblies of strains TattoneD and LoenenD were aligned to the assembly of H4-8 using  
178 PROmer version 3, which is part of the MUMmer package<sup>46</sup>. The setting "mum" was used. Next, a  
179 sliding window approach (1 kbp window with 100 bp step size) was taken to determine the percentage  
180 of identity across the assemblies of the strains.

181

#### 182 **Comparative transcriptomics during growth on various carbon sources**

183 Cultures of strain H4-8 and TattoneD were pre-grown on a Whatman Cyclopore™ polycarbonate (PC)  
184 membrane on top of minimal medium containing glucose at 30°C in the dark. After 3 days, the PC  
185 membranes containing the cultures were carefully transferred to fresh plates containing solid minimal

186 medium with either glucose, cellulose (avicel) or birchwood (ground to a particle size of 1 to 3 mm) as  
187 sole carbon source. After 3 days, the cultures were harvested, lyophilized, powdered in liquid nitrogen,  
188 and RNA was extracted using the Zymo Direct-zol RNA MiniPrep kit. The quality of the RNA was  
189 assessed with an Agilent 2100 Bioanalyzer. All conditions were analyzed with biological triplicates.

190 Illumina libraries were generated for RNA-Seq and subsequently sequenced on the Illumina  
191 HiSeq-2000 platform in 1x50 bp mode. The exceptions to this were the three glucose replicates from  
192 strain H4-8, since these were sequenced in 2x100 bp mode. To avoid any biases during mapping and  
193 counting between these samples and the others, only the first 50 bp from the left read pair were  
194 extracted from these samples using BBduk (part of the BBDuk suite <sup>47</sup>) and used in the subsequent  
195 transcriptome analysis.

196 The sequence reads were aligned to their respective genome assemblies, *S. commune* H4-8  
197 (version Schco3) or *S. commune* TattonD (version Schco\_TatD\_1), using the aligner Hisat version  
198 2.1.0<sup>48</sup>. Default settings were used, with these exceptions: --min-intronlen 20 --max-intronlen 1000.  
199 Expression values were calculated as RPKM values (Reads per Kilobase model per Million mapped  
200 reads) using Cuffdiff version 2.2.1, which is part of the Cufflinks package<sup>49</sup>. The bias correction method  
201 was used while running Cuffdiff<sup>50</sup>. In addition to the cutoff used by Cuffdiff to identify differentially  
202 expressed genes, we applied an additional filter of at least a 4-fold change in expression value, as well  
203 as at least one condition with an expression value of at least 10 RPKM. Over-representation and under-  
204 representation of functional annotation terms in sets of differentially expressed genes were calculated  
205 using the Fisher Exact test. The Benjamini-Hochberg correction was used to correct for multiple testing  
206 and as a cutoff for significance we used a corrected *p*-value of 0.05.

207 To compare gene expression, we first identified orthologs between the two strains. Here,  
208 proteins are considered orthologs if they show strong homology (having a best bidirectional hit in a  
209 blastP analysis applying an E-value cutoff of 1e-10) and if they display syntenic gene order conservation  
210 (at least 1 of 4 neighbors should be shared between the strains).

211 The gene expression profiles were visualized with a heat map generated by the seaborn  
212 package for python (<https://seaborn.pydata.org>). The genes were clustered using the euclidean  
213 distance and average linkage methods. The values were scaled for each gene with a z-transformation,  
214 resulting in a z-score.

215

## 216 **Conservation of Roc1 in the fungal kingdom**

217 The genome sequences and predicted genes/proteins of 140 previously published fungi were obtained  
218 from the publications listed in Table S1. Curating these previously published gene predictions was  
219 beyond the scope of this study. Conserved protein domains were identified using PFAM version 32<sup>37</sup>.  
220 Roc1 is classified as a putative transcription factor based on the presence of a Zn<sub>2</sub>Cys<sub>6</sub> DNA binding  
221 domain as well as a fungal specific transcription factor domain (Pfam domains PF00172 and PF04082,  
222 respectively). We took a multi-step approach to more accurately identify putative Roc1 orthologs. First,  
223 we identified transcription factors of the same broad family by selecting proteins with one Pfam domain  
224 PF00172 and one Pfam domain PF04082. Next, the sequences of these domains were concatenated  
225 and used to reconstruct an initial gene tree of fungal-specific transcription factors. The sequences were



226 aligned with MAFFT 7.310 using auto settings<sup>51</sup>. FastTree 2.1 with default settings was used to calculate  
227 the gene tree<sup>52</sup>. Manual inspection of the tree revealed a group of proteins from basidiomycetes and  
228 ascomycetes that clustered with Roc1, and these were labeled as candidate orthologs. Next, the full  
229 proteins of these candidate orthologs were aligned (instead of only the Pfam domains) with MAFFT and  
230 FastTree (as described above). Manual inspection of both the tree and the alignments revealed that in  
231 the Agaricomycetes the conserved sequence extended along the entire protein, while in the other  
232 basidiomycetes as well as the other phyla conservation was largely restricted to the Pfam domains. For  
233 this reason, we constructed a custom HMM model using the full protein alignments of only the Roc1  
234 candidates of the Agaricomycetes. This HMM model was made using HMMER version 3.3.2  
235 (hmmer.org) with default settings. The predicted proteins in the genomes of all 140 fungi were scanned  
236 with the HMM, using hmmsearch (part of the HMMER package) with a score cutoff of 500. A new gene  
237 tree was calculated as described above, containing the proteins in the previously mentioned tree, as  
238 well as any proteins that were additionally identified with the HMM approach. Proteins with this  
239 conserved Roc1 HMM domain, Pfam domain PF00172 and Pfam domain PF04082 were considered  
240 Roc1 orthologs, while the other candidates were considered distant homologs.

241 A phylogenetic tree of the 140 species (species tree) was reconstructed using 25 highly  
242 conserved proteins identified with BUSCO v2 (dataset 'fungi\_odb9')<sup>53</sup>. Sequences were aligned with  
243 MAFFT 7.307<sup>51</sup> and well-aligned regions were subsequently identified using Gblocks 0.91b<sup>54</sup> resulting  
244 in 17196 amino acid positions. FastTree 2.1 was used for phylogenetic tree reconstruction using default  
245 settings<sup>52</sup>. The phylogenetic species tree was rooted on 'early-diverging fungi' (i.e. non-Dikarya). Python  
246 toolkit ete3<sup>55</sup> was used to visualize the gene tree and species trees.

247

#### 248 **Deletion of gene *roc1* in strain H4-8**

249 Gene *roc1* (proteinID 2615561 in version Schco3 of the genome of *S. commune*) was deleted using our  
250 previously published protocol<sup>17</sup>, which uses pre-assembled Cas9-sgRNA ribonucleoproteins and a  
251 repair template to replace the target gene with a selectable marker. The repair template was a plasmid  
252 comprising a pUC19 backbone, 1068 bp up-flank of *roc1*, a 1326 bp nourseothricin resistance cassette,  
253 1062 bp down-flank of *roc1*, and a phleomycin resistance cassette. The nourseothricin resistance  
254 cassette was cut from plasmid pPV010 using the restriction enzyme EcoRI. The 4112 bp pUC19  
255 backbone and phleomycin resistance cassette were cut from plasmid pRO402 using the restriction  
256 enzyme HindIII. The up-flank and down-flank were amplified from genomic DNA of strain H4-8 using  
257 primer pairs Roc1UpFw / Roc1UpRev and Roc1DownFw / Roc1DownRev, respectively (Table S2). The  
258 5' overhangs of these primers were chosen to facilitate Gibson assembly of the four fragments into a  
259 single plasmid (NEBuilder HiFi DNA Assembly Master Mix; New England Biolabs). The resulting  
260 plasmid pRO405 was verified by restriction analysis and Sanger sequencing.

261 The sgRNAs were designed on regions downstream and upstream of the up-flank and down-  
262 flank of *roc1*, respectively, and one sgRNA was selected for each region as previously described<sup>17</sup>.  
263 They were synthesized *in vitro* using the GeneArt Precision sgRNA Synthesis Kit (ThermoFisher  
264 Scientific) using *roc1*-specific primers Roc1LeftsgRNAp1 / Roc1LeftsgRNAp2 and Roc1RightsgRNAp1  
265 / Roc1RightsgRNAp2 (Table S2).

266 Protoplasts of strain  $\Delta ku80$  were transformed with the pre-assembled ribonucleoproteins  
267 and the repair template, as previously described<sup>17</sup>. A first selection was done on minimal medium with  
268 15  $\mu\text{g ml}^{-1}$  nourseothricin. The resistant transformants were transferred to a second selection plate with  
269 nourseothricin and subsequently screened on minimal medium with 25  $\mu\text{g ml}^{-1}$  phleomycin.  
270 Nourseothricin-resistant transformants that are phleomycin-sensitive are candidates for *roc1* deletion  
271 strains, whereas those that are phleomycin-resistant are likely the result of an ectopic integration of the  
272 plasmid and therefore undesirable. Six transformants were nourseothricin-resistant, of which four were  
273 phleomycin-sensitive. The latter were candidates to have the gene deletion and a confirmation PCR  
274 was carried out with primers Roc1-Chk-A and Roc1-Chk-D (Table S2) that amplify the integration locus  
275 (resulting in a 5007 bp product in the case of the wild type situation, or a 3532 bp product in the case  
276 of a correct gene deletion). One of these  $\Delta roc1\Delta ku80$  strains was selected and crossed with the  
277 compatible wild type H4-8b in order to eliminate the  $\Delta ku80$  background. Meiotic basidiospores were  
278 collected and the offspring was grown on minimal medium with nourseothricin and 48 out of 72 were  
279 resistant. A second selection was done with the 48 nourseothricin-resistant strains on minimal medium  
280 with 20  $\mu\text{g ml}^{-1}$  hygromycin and 23 individuals out of 48 were hygromycin-sensitive, indicating that these  
281 do not have the  $\Delta ku80$  background. A nourseothricin-resistant and hygromycin-sensitive strain with the  
282 same mating type as H4-8 was selected.

283

#### 284 **Complementation of the $\Delta roc1$ deletion**

285 The *roc1* deletion strain was complemented with a plasmid expressing a C-terminally haemagglutinin-  
286 tagged version of *roc1*. The promoter and coding sequence of *roc1* were amplified with primers  
287 Roc1ChipFw and Roc1ChipRev. Plasmid pPV009 (which contains a C-terminal triple HA tag as well as  
288 a phleomycin resistance cassette) was linearized with HindIII. Gibson assembly was used to combine  
289 the two fragments into the final complementation plasmid. The protoplasting of *S. commune*  $\Delta roc1a$   
290 and the transformation with the complementation plasmid were carried out as previously described<sup>22</sup>.  
291 A first selection was done on minimal medium with 25  $\mu\text{g ml}^{-1}$  phleomycin. Twenty-three transformants  
292 were transferred to a second selection plate with phleomycin. Twenty-one of them showed growth and  
293 they were initially screened on cellulose (Avicel) plates together with the wild type. Ten transformants  
294 had a similar growth when compared to the wild type. A second screening was done on minimal medium  
295 and 7 transformants resembled the wild type phenotype. These were subjected to a PCR check with  
296 primers Roc1ChipCheckFw and Roc1ChipCheckRev (Table S2). Four transformants showed the  
297 desired 4330 bp fragment indicating they might be good candidates for  $\Delta roc1$  complementation strains.  
298 One of these strains was selected and named  $\Delta roc1 :: roc1-HA$ . A western blot was done (see below)  
299 and this strain showed a 78 kDa band when grown on cellulose, which was absent in the wild type. This  
300 indicated that the Roc1 protein was correctly tagged with the HA-tag.

301

#### 302 **Cellulase activity assay**

303 The *S. commune* strains were pre-cultured on a Poretics™ Polycarbonate Track Etched (PCTE)  
304 Membrane (GVS, Italy) placed on top of glucose medium for 5 days at 30°C. The mycelia of five  
305 cultures for each strain were macerated in 100 ml minimal medium with either 1% cellulose (Avicel) or



306 5% glycerol (as indicated in the Results section) for 1 minute at low speed in a Waring Commercial  
307 Blender. The macerate was evenly distributed to 250 ml Erlenmeyers (20 ml each) containing 80 ml  
308 minimal medium with either 1% cellulose (Avicel) or 5% glycerol. Four Erlenmeyers for each strain were  
309 placed in an Innova incubator shaker for 10 days at 30°C with shaking at 200 rpm. Samples of the  
310 culture medium (1 mL) were collected after 6 days and centrifuged at 9400 g for 10 min. The supernatant  
311 was then used for the total cellulase enzyme activity measurement using the filter paper activity (FPase)  
312 assay<sup>56</sup>. Total cellulase activity was determined by an enzymatic reaction employing circles with a  
313 diameter of 7.0 mm of Whatman No. 1 filter paper and 60 µl of supernatant. The reaction was incubated  
314 at 50°C for 72 hours. Next, 120 µL of dinitrosalicylic acid (DNS) was added to the reaction, which was  
315 then heated at 95°C for 5 minutes. Finally, 100 µl of each sample was transferred to the wells of a flat-  
316 bottom plate and absorbance was read at 540 nm using a BioTek Synergy HTX Microplate Reader.  
317 One enzyme unit (FPU) was defined as the amount of enzyme capable of liberating 1 µmol of reducing  
318 sugar per minute (as determined by comparison to a glucose standard curve).

319

### 320 **Western blot analysis**

321 A Western blot was performed to confirm that the Roc1 protein was correctly tagged with the  
322 haemagglutinin tag. Nine-day old mycelia grown on a Polycarbonate Track Etched (PCTE) Membrane  
323 (GVS, Italy) placed on top of 1% Avicel plates were harvested, snap-frozen in liquid nitrogen and ground  
324 to a fine powder using a Qiagen Tissue Lyser II (Qiagen, Germany) at 25 Hz for 60 seconds. 120 mg  
325 of biomass per sample was boiled in 500 µl of 2x Laemmli sample buffer (4% SDS, 20% glycerol, 10%  
326 B-mercaptoethanol, 0.004% bromophenol blue, 0.125M Tris pH 6.8) for 5 minutes, centrifuged for 10  
327 minutes at 10000 g to precipitate cellular debris, and 20 µl of each sample was size separated on a  
328 12% Mini-PROTEAN® TGX Stain-Free™ Precast Gel (Bio-Rad, CA, USA) at 200V for 40 minutes.  
329 After electrophoresis the proteins were transferred to a polyvinylidene difluoride membrane  
330 (ThermoFisher Scientific, MA, USA) according to the manufacturer's specification. The membrane was  
331 blocked for 1 hour with 5% bovine serum albumin (Sigma-Aldrich, MO, USA) in phosphate buffered  
332 saline supplemented with Triton X-100 (PBS-T) (137 mM NaCl, 10 mM Na<sub>2</sub>HPO<sub>4</sub>, 1.8 mM KH<sub>2</sub>PO<sub>4</sub>,  
333 2.7 mM KCl, 0.1% Triton X-100) and then incubated for one hour with 1:10000 diluted monoclonal  
334 mouse anti-HA antibody (#26183, ThermoFisher Scientific, MA, USA) in PBS-T. After incubation, the  
335 membrane was washed five times for 15 minutes with PBS-T. The membrane was incubated for one  
336 hour with 1:10000 diluted horseradish peroxidase-coupled goat anti-mouse antibody (#62-6520,  
337 ThermoFisher Scientific, MA, USA) in PBS-T and washed again five times for 15 minutes with PBS-T.  
338 The antibody binding was imaged with Clarity Western ECL Substrate (Bio-Rad, CA, USA).

339

### 340 **ChIP-seq analysis**

341 Protein-DNA interaction and binding sites of Roc1 were surveyed by chromatin immunoprecipitation  
342 followed by next-generation sequencing (ChIP-Seq). The ChIP was performed with Pierce Anti-HA  
343 Magnetic Beads (ThermoFisher Scientific, MA, USA) and was adapted from previous studies in human  
344 cell lines and *Zymoseptoria tritici*<sup>57,58</sup> and our recently developed method for ChIP-Seq on Histone H3  
345 (H3K4me2) in *S. commune*<sup>19</sup>. Briefly, monokaryons of strains H4-8 or H4-8  $\Delta roc1 :: roc1-HA$  were

346 grown on medium with Avicel on Poretics™ Polycarbonate Track Etched (PCTE) Membrane (GVS,  
347 Italy). After 9 days 10 colonies were collected per replicate and washed twice in Tris-buffered saline  
348 (TBS) (50 mM Tris pH 7.5, 150 mM NaCl). The colonies were fixated by vacuum infiltration with 1%  
349 formaldehyde in TBS for 10 minutes and the reaction was quenched by vacuum infiltration with 125 mM  
350 glycine for 5 minutes. The samples were frozen in liquid nitrogen and homogenized in stainless steel  
351 grinding jars in a TissueLyser II (Qiagen) for 2 minutes at 30 Hz. The resulting homogenized mycelium  
352 was resuspended in 10 ml cell lysis buffer (20 mM Tris pH 8.0, 85 mM KCl, 0.5% IGEPAL CA-630  
353 (Sigma, MO, USA), 1x cOmplete protease inhibitor cocktail (Roche, Switzerland) and incubated on ice  
354 for 10 minutes. The samples were centrifuged at 2500 g for 5 minutes at 4°C and the pellet was  
355 resuspended in 3 mL nuclei lysis buffer (10 mM Tris pH 7.5, 1% IGEPAL CA-630, 0.5% sodium  
356 deoxycholate, 0.1% SDS, 1x cOmplete protease inhibitor cocktail). The released chromatin was  
357 fragmented on ice for 8 minutes with sonication, using a branson sonifier 450 (Emerson, MO, USA) with  
358 a microtip at setting 4 with 35% output. To prevent sample degradation, the microtip was cooled for 1  
359 minute every 2 minutes. Pure fragmented chromatin was obtained by collecting the supernatant after  
360 centrifugation at 15000 g for 10 minutes at 4°C. As input control, 300 µl of sheared chromatin was  
361 stored at -80°C for subsequent DNA isolation (see below). The volume of the remaining sheared  
362 chromatin was adjusted to 3 ml with ChIP dilution buffer (0.01% SDS, 1.1% Triton X-100, 1.2 mM EDTA,  
363 16.7 mM Tris pH 8.0, 167 mM NaCl, 1x cOmplete protease inhibitor cocktail). The chromatin was  
364 immunoprecipitated for 16 hours with 50 µl Anti-HA magnetic beads that were equilibrated with ChIP  
365 dilution buffer. After incubation, the beads were collected and subsequently washed in low salt washing  
366 buffer (0.1% SDS, 1% Triton, 2 mM EDTA, 20 mM Tris pH 8.0, 150 mM NaCl), twice in high salt washing  
367 buffer (low salt washing buffer with 500 mM NaCl), twice in lithium chloride washing buffer (250 mM  
368 LiCl, 1% IGEPAL CA-630, 1% sodium deoxycholate, 1 mM EDTA, 10 mM Tris pH 8.0) and twice in TE  
369 buffer. During all washing steps the samples were incubated for 5 minutes. After addition of the second  
370 lithium chloride washing buffer, the samples were transferred from 4°C to room temperature. The  
371 chromatin was eluted from Anti-HA magnetic beads by incubating twice in 250 µl elution buffer (1%  
372 SDS, 100 mM NaHCO<sub>3</sub>) for 10 minutes. After ChIP, the input controls were adjusted to 500 µl with  
373 water. Both samples and input controls were incubated with 50 µg RNAse A for 1 hour at 50°C and  
374 decrosslinked overnight at 65°C with 75 µl reverse crosslinking buffer (250 mM Tris pH 6.5, 62.5 mM  
375 EDTA, 1.25 M NaCl, 5 mg ml<sup>-1</sup> proteinase K (ThermoFisher Scientific). DNA was isolated with phenol-  
376 chloroform extraction. Briefly, samples were mixed with 1 volume of phenol-chloroform (1:1), samples  
377 were centrifuged at 15000 g for 5 minutes and the aqueous phase was collected. This step was  
378 repeated 2 times. The extraction was repeated with 1 volume of chloroform, to remove residual phenol.  
379 The DNA was coprecipitated with 20 mg glycogen (ThermoFisher, MA, USA) by the addition of 58 µL  
380 3M NaAc pH 5.6 and 1160 µL ethanol and stored at -80°C for 2 hours. The DNA was collected by  
381 centrifugation at 15000 g for 45 minutes at 4°C and washed with 1 mL 70% ethanol. Finally, DNA was  
382 dissolved in 30 µL TE buffer. Next, the DNA was purified with the ChargeSwitch gDNA Plant Kit  
383 (ThermoFisher Scientific, MA, USA) according to manufacturer's specifications and eluted in 50 µl  
384 ChargeSwith Elution Buffer. The DNA samples were amplified and barcoded with the NEXTFLEX Rapid  
385 DNA-Seq library kit (Bioo Scientific, TX, USA) according to manufacturer's specifications without size

386 selection. The DNA concentration was determined with the NEBNext Library Quant Kit for Illumina (New  
387 England Biolabs, MA, USA) and pooled in equimolar ratios with unique barcodes for each sample. The  
388 libraries were sequenced on an Illumina NextSeq 500 with paired-end mid output of 75 bp by the Utrecht  
389 Sequencing Facility (USeq, [www.useq.nl](http://www.useq.nl)).

390 The paired-end reads of the controls and samples were aligned to the *S. commune* H4-8  
391 reference genome (version Schco3<sup>21</sup>) with bowtie2 (version 2.3.4.1)<sup>59</sup>. Reads with multiple  
392 alignments and a quality score < 2 were removed with samtools (version 1.7)<sup>60</sup>. Optical duplicates  
393 were flagged with picard tools (<http://broadinstitute.github.io/picard/>) (version 2.21.6) and removed  
394 with samtools. Peaks in both WT H4-8 and H4-8  $\Delta roc1::roc1-HA$  were identified with macs2 (version  
395 2.2.3)<sup>61</sup>. To filter out any non-specific binding, peaks identified in both the WT and  $\Delta roc1::roc1-HA$   
396 strains were excluded from the analysis. Peaks that overlapped repetitive regions (including  
397 transposons) were removed. The peaks were associated with a gene if they were within 1000 bp of  
398 the predicted translation start site. The correlation between replicates was determined with the R  
399 package DiffBind (version 2.12.0).

400

#### 401 **Motif discovery**

402 STREME (which is part of the MEME Suite<sup>62</sup>) was used to identify conserved motifs in the ChIP-Seq  
403 peaks. STREME looks for ungapped motifs that are relatively enriched in a set of sequences compared  
404 to negative control sequences. The 200 bp region around the center of the peak was analyzed for  
405 enriched motifs, with 10000 regions of the same length from across the genome as negative sequence  
406 set. The minimum motif length was set to 5 bp and the maximum motif length to 25 bp. The location of  
407 these motifs in the ChIP-Seq peaks was determined with FIMO (which is part of the MEME Suite<sup>62</sup>).  
408 The GC content along the ChIP-Seq peaks was determined with a sliding 25 bp window (step size 5  
409 bp) and averaging the GC content for that window in all ChIP-Seq peaks. To plot the location of the  
410 conserved motifs, the peaks were first divided into bins of 20 bp. Next, the density of the motifs along  
411 the ChIP-Seq peaks was determined for each bin by dividing the number of motifs in that bin (in all  
412 ChIP-Seq peaks) by the total number of ChIP-Seq peaks.

413

#### 414 **Functional promoter analysis**

415 Several lengths (approximately 100 bp, 200 bp, 300 bp and 700 bp) of the promoter (defined here as  
416 the region located 5' of the predicted translation start site) of gene *lpmA* (proteinID 1190128) were  
417 amplified from H4-8 genomic DNA with the primers GbGH61Pr700Fw (or the primer corresponding to  
418 the length) and GbGH61PrRev. The gene encoding the red fluorescent protein dTomato<sup>63</sup> was amplified  
419 from plasmid pRO151<sup>64</sup> with primers GbdTomatoFw and GbdTomatoRev. The primers used are listed  
420 in Table S2. The plasmid backbone (which comprises a nourseothricin resistance cassette) was cut  
421 from vector PTUB750\_SS3\_HC\_iT3\_Nour\_p20<sup>65</sup> with restriction enzymes HindIII and BamHI. The  
422 components of the construct were joined using the Gibson Assembly method (NEBuilder HiFi DNA  
423 Assembly Master Mix, New England Biolabs, MA, USA), resulting in the *dTomato* gene under the control  
424 of several lengths of the promoter of *lpmA* (plasmids pRO311, pRO312, pRO313 and pRO305, which  
425 contain the promoter length of 100 bp, 200 bp, 300 bp and 700 bp, respectively). A motif in the 300 bp

426 promoter (in plasmid pRO313) was changed from CGGACCG to ATTAAT by site directed  
427 mutagenesis using Gibson Assembly (NEBuilder HiFi DNA Assembly Master Mix) and primers  
428 GbGH61Pr300MutFw and GbGH61Pr300MutRv (Table S2), resulting in plasmid pPV049. Protoplasts  
429 of strain H4-8b were transformed with these dTomato reporter constructs, as previously described<sup>22</sup>.  
430 Nourseothricin-resistant transformants were selected for further analysis under the fluorescence  
431 microscope.

432

### 433 **Fluorescence microscopy and sample preparation**

434 Mycelia were grown in triplicate for 72h at 30°C on a Poretics™ Polycarbonate Track Etched (PCTE)  
435 Membrane (GVS, Italy) placed on top of solid minimal medium. Microscopy samples were prepared by  
436 carefully scraping mycelium of the colony from the PCTE membrane with a scalpel and placing it on a  
437 slide with a drop of water for adherence and a cover slip. The dTomato fluorescence was detected with  
438 an Axioskop 2 plus microscope (Zeiss, Germany) equipped with a 100 Watt HBO mercury lamp and a  
439 sCMEX-20 Microscope Camera (5440×3648 pixels) using the TRITC (Tetramethyl Rhodamine Iso-  
440 Thiocyanate) filter (excitation at 550 nm and emission at 573nm). The images were taken using  
441 ImageFocus Alpha software (24-bit color depth).

442

443

444

## 445 **RESULTS**

446

### 447 **Comparison of growth profile of three strains of *S. commune* on various carbon sources**

448 The growth profile of *Schizophyllum commune* was determined on carbon sources associated with  
449 wood (including cellulose, hemicellulose, and pectin) and other carbon sources (including glucose,  
450 maltose and starch) (Figure 1). The reference strain H4-8 was compared to strains LoenenD and  
451 TattoneD. The latter two are haploid (monokaryotic) strains that were obtained (by protoplasting) from  
452 the dikaryotic wild isolate strains collected in Loenen aan de Vecht (Netherlands) and Tattone (Corsica,  
453 France). Strain LoenenD displayed reduced growth on maltose, starch, xylose, xylan and cellulose, but  
454 improved growth on pectin and cellobiose compared to H4-8 (Figure 1). In contrast, the growth profile  
455 of strain TattoneD was more similar to that of strain H4-8, with the notable exceptions of cellulose  
456 (TattoneD grew slower than H4-8) and pectin (TattoneD grew faster than H4-8). Together, there is  
457 considerable phenotypic diversity between the various strains of *S. commune*.

458

### 459 **Genome sequences of three strains of *S. commune***

460 The genome sequence and annotation of strain H4-8 were previously published<sup>21</sup> and we here report  
461 an updated version (Schco3). Moreover, we sequenced strains TattoneD and LoenenD and generated  
462 draft assemblies and annotations (Table S3).

463 The original Sanger-sequenced assembly of strain H4-8 (version Schco1) was improved by  
464 extensive targeted gap-sequencing and manual reassembly. This reduced the number of scaffolds from  
465 36 to 25, and considerably reduced the percentage of assembly gaps from 1.43% to 0.15%.

466 Furthermore, a new set of gene predictions was generated using the RNA-Seq data used for the  
467 comparative transcriptomics described below. This raised the gene count from 13181 to 16204. The  
468 coding content of the assembly (i.e. the percentage of the assembly consisting of coding sequence)  
469 increased from 45.81% to 52.89%, indicating that genes that were missed in the original annotation  
470 were added to the new set. All statistics regarding the functional annotation of the predicted genes  
471 improved in the new annotation, indicating that the new gene set is more complete (i.e. more predicted  
472 genes were assigned a functional annotation) (Table S3). The BUSCO completeness score improved  
473 to 99.13%, further showing that the new assembly and gene predictions are of high quality. This new  
474 assembly and set of gene predictions will therefore be a valuable tool for functional analysis of this  
475 important model system of mushroom-forming fungi.

476 Draft assemblies and gene predictions were generated for strains Tattoned and Loened.  
477 Although both are more fragmented than the assembly of reference strain H4-8, the corresponding sets  
478 of gene predictions are similarly complete, as determined by BUSCO (98.62% and 99.31%,  
479 respectively). Illumina-sequenced genomes are generally more fragmented than Sanger-sequenced  
480 genomes, especially regarding repeat-rich regions<sup>66</sup>. This is reflected in the lower percentages of  
481 repetitive content for strains Tattoned and Loened, compared to H4-8. Importantly, the coding content  
482 of the assemblies are in a similar range, indicating that the set of gene predictions is reliable.

483 The three strains displayed a high degree of sequence diversity at the level of the genome  
484 (Figure 2A and 2B). Large parts of the genome display less than 95 % similarity (over a 1 kb sliding  
485 window). In some cases (e.g. scaffolds 12, 15 and 19) the (sub)telomeric regions of strain H4-8 are not  
486 found in strains Tattoned or Loened. Despite this high degree of sequence diversity among the three  
487 strains, the majority of genes are conserved between the strains (Figure S1). The set of predicted  
488 carbohydrate-active enzymes (CAZymes) is remarkably similar between the strains (Figure 2C and  
489 Table S4). Therefore, the difference in growth profile on the various carbon sources cannot be easily  
490 explained by the CAZyme gene counts.

491

## 492 **Comparative transcriptomics reveals conserved expression responses to lignocellulosic** 493 **carbon sources**

494 We performed a comparative transcriptomics analysis to determine whether, despite the high level of  
495 phenotypic and sequence diversity, there is a conserved expression response to lignocellulosic carbon  
496 sources. Strains H4-8 and Tattoned were pre-grown on minimal medium with glucose as carbon source  
497 and after 3 days the colonies were transferred to medium containing either glucose, cellulose (Avicel),  
498 or wood. After 3 days of exposure to this carbon source the colonies were harvested, RNA was isolated,  
499 and RNA-Seq was performed (Table S5). The heat maps of the expression profiles are depicted in  
500 Figure S2.

501 Glucose does not require extracellular breakdown by CAZymes, in contrast to the polymeric  
502 compounds cellulose and wood. Therefore, the most relevant differences in expression profiles were  
503 expected between samples grown on glucose and either cellulose or wood. Indeed, 166 and 210 genes  
504 of strains H4-8 and Tattoned were up-regulated when growth on cellulose when compared to glucose,



505 respectively. Similarly, 468 and 500 genes of these strains were up-regulated on wood, respectively  
506 (Figure S2).

507 Next, we performed a comparative transcriptomics analysis on the two strains on various  
508 carbon sources, in an effort to identify conserved responses. Orthologs were identified between the two  
509 strains and their regulation profile was compared (Figure 3). Again, we focused the analysis on  
510 expression on cellulose when compared to glucose (Figure 3A) and on wood when compared to glucose  
511 (Figure 3B). Orthologs in the upper right corner of Figures 3A and 3B displayed a conserved expression  
512 profile on the corresponding carbon sources and many of those are predicted CAZymes. The orthologs  
513 annotated as CAZymes showed a more conserved response between the strains (Pearson correlation  
514 of 0.88 and 0.88, on cellulose and wood, respectively) than for the full set of genes (Pearson correlation  
515 of 0.54 and 0.66, on cellulose and wood, respectively). The expression profile of transcription factors  
516 was less conserved between the strains than the CAZymes (Pearson correlation of 0.5 and 0.7, on  
517 cellulose and wood, respectively). In fact, only one transcription factor displayed a conserved  
518 expression profile in both strains on cellulose and wood.

519 Orthologs that are up-regulated on complex carbon sources in one strain, but not in the other  
520 strain, (i.e., the dots above and to the right of the green square in Figures 3A and 3B) do not show a  
521 conserved expression response. Therefore, those genes may explain part of the difference in  
522 phenotype displayed by these strains on complex carbon sources. Furthermore, orthologs that are up-  
523 regulated in both strains during growth on cellulose or wood but that do not have a CAZyme annotation  
524 (i.e., the black dots in the upper right corners of Figure 3A and 3B) may represent novel CAZymes, or  
525 other genes involved in growth on complex carbon sources.

526 Next, we focused on the orthologs that displayed a conserved expression response (i.e., in  
527 both strains) to complex carbon sources when compared to growth on glucose (Figures 3C and 3D).  
528 Orthologs that were up-regulated on cellulose in both strains were largely a subset of the orthologs that  
529 were up-regulated on wood, and a considerable number of those were CAZymes (Figure 3C). This  
530 indicates that the expression program that is activated during growth on cellulose is also activated  
531 during growth on wood. However, on wood a large number of additional genes were also up-regulated  
532 and were likely involved in the degradation of the complex set of polymers present in this substrate.

533 Transcription factors, on the other hand, were not found to a large extent in the conserved  
534 changes in gene expression (Figure 3D). In fact, only one transcription factor was up-regulated on both  
535 cellulose and on wood (when compared to on glucose) in both strain H4-8 and Tattoned (protein ID  
536 Schco3|2615561 and Schco\_TatD\_1|232687; Figure 3A, 3B and 3D). In strain H4-8 the expression is  
537 up-regulated 13-fold and 18-fold on cellulose and wood, respectively, when compared to glucose (Table  
538 S5). We hypothesized that this transcription factor (from here on named Roc1 for 'regulator of  
539 cellulases') is involved in the regulation of gene expression during growth on lignocellulose.

540

#### 541 **Regulator Roc1 is only conserved in the class Agaricomycetes**

542 Roc1 is classified as a putative transcription factor based on the presence of a Zn<sub>2</sub>Cys<sub>6</sub> DNA binding  
543 domain and a fungal-specific transcription factor domain (Pfam domains PF00172 and PF04082,  
544 respectively). These domains are frequently found together and in most fungi this is the most common



545 family of transcription factors<sup>10</sup> with many (distant and functionally unrelated) members across the  
546 fungal kingdom. Examples include GAL4 in *S. cerevisiae*<sup>67</sup> and XlnR in *Aspergillus niger*<sup>68</sup>. The  
547 reference genome of *S. commune* (strain H4-8) encodes 41 members of this transcription factor family.

548 The genomes of 140 fungi from across the fungal tree were analyzed for orthologs of Roc1  
549 (Table S1). Since the fungal-specific Zn<sub>2</sub>Cys<sub>6</sub> transcription factor family is large, numerous homologs of  
550 Roc1 are found in each genome. We distinguished between homologs and orthologs using a gene tree-  
551 based approach, combined with the location of conserved domains (Figure S3). Roc1 orthologs were  
552 only found in members of the class Agaricomycetes in the phylum Basidiomycota (Figure S4). These  
553 orthologs clustered closely together in the gene tree (having short branch lengths) and were highly  
554 conserved across the length of the protein (Figure S3).

555

### 556 **A $\Delta roc1$ strain is incapable of efficiently utilizing cellulose as a carbon source**

557 A  $\Delta roc1$  strain was generated in strain H4-8 using our recently published CRISPR/Cas9 genome editing  
558 protocol<sup>17</sup> by replacing 2759 bp (which includes the *roc1* coding sequence) with a nourseothricin  
559 resistance cassette.

560 Growth of  $\Delta roc1$  on cellulose (Avicel) was strongly reduced when compared to the reference  
561 (Figure 1). Only a very thin mycelium was observed and no aerial hyphae were formed. Moreover,  
562 growth on cellobiose and xylan was also reduced, although to a lesser extent than on cellulose. Both  
563 these carbon sources are found in lignocellulose. In contrast,  $\Delta roc1$  displays no phenotype when  
564 grown on glucose, maltose, starch, pectin and xylose when compared to the reference H4-8.

565 The wild type phenotype was largely rescued when the  $\Delta roc1$  strain was complemented with  
566 the *roc1* coding sequence under control of its own promoter (Figure 1), confirming that the phenotype  
567 was caused by the deletion of *roc1*. The coding sequence included a C-terminal haemagglutinin tag,  
568 allowing us to use the complementation strain for ChIP-Seq with a commercially available anti-HA  
569 antibody (see below).

570

### 571 **Total cellulase enzyme activity in the growth medium is strongly reduced in $\Delta roc1$**

572 We assessed whether the strongly reduced growth of the  $\Delta roc1$  strain on cellulose coincided with  
573 reduced cellulase enzyme activity in the growth medium. Biomass was pre-grown in liquid minimal  
574 medium with glucose, washed and subsequently used to inoculate liquid shaking cultures containing  
575 cellulose as carbon source. After 6 days, the cellulase activity in the growth medium was determined  
576 (Figure 4). Compared to the reference strain H4-8, the  $\Delta roc1$  strain had strongly reduced cellulase  
577 activity in the growth medium. Moreover, this phenotype was rescued in the complemented  $\Delta roc1$  strain.  
578 The lack of growth of  $\Delta roc1$  on cellulose (Figure 1) can be explained by the low cellulase activity in this  
579 strain, since these cellulases are required to break down cellulose. Furthermore, it suggests that Roc1  
580 regulates the expression of cellulose-degrading genes.

581

### 582 **ChIP-Seq reveals binding sites of Roc1 in promoters of cellulases**

583 Transcription factors may regulate the expression of genes in a direct (e.g., by binding to their  
584 promoter) or indirect manner (e.g., by regulating other transcription factors that in turn directly

585 regulate these genes). A ChIP-Seq analysis was performed to identify the binding sites of Roc1 in  
586 the genome, allowing us to determine whether Roc1 directly binds the promoters of cellulase genes.

587 The Roc1 transcription factor was tagged with a haemagglutinin (HA) tag and expressed  
588 in the deletion strain (resulting in strain  $\Delta roc1 :: roc1-HA$ ), allowing the ChIP-Seq to be performed  
589 using commercially available antibodies against the HA-tag (Figure S5). Since this tagged version can  
590 complement the phenotype of the *roc1* deletion (Figures 1 and 4), it can be concluded that the HA-  
591 tag does not interfere with the function of Roc1.

592 The strains H4-8 and  $\Delta roc1 :: roc1-HA$  were grown on medium containing cellulose, and  
593 the chromatin immunoprecipitation (ChIP) procedure was performed to isolate the DNA to which  
594 Roc1 binds. This DNA was subsequently purified and sequenced using Illumina technology. The  
595 resulting sequence reads were aligned to the assembly of strain H4-8 and peaks were identified,  
596 which may be considered binding sites of Roc1.

597 A total of 1474 binding sites of Roc1 were identified during growth on cellulose, which  
598 were associated with 1125 unique genes (Table S6). CAZyme genes as a group were not enriched  
599 among those genes ( $p > 0.05$ ), but, in contrast, specific CAZyme families were strongly enriched  
600 (Table S7), as well as genes that were up-regulated on cellulose (Figure 5A). A notable family of  
601 genes with binding sites of Roc1 are the lytic polysaccharide monooxygenases (LPMOs), also  
602 annotated as CAZyme family AA9 (auxiliary activity 9). This family was previously shown to be  
603 involved in cellulose degradation<sup>69</sup>. Of the 22 LPMO genes encoded in the genome, 12 were  
604 associated with a Roc1 binding site. Moreover, 10 of these 12 were up-regulated during growth on  
605 cellulose when compared to growth on glucose. This indicates that Roc1 directly binds to the  
606 promoters of these genes during growth on cellulose, activating their expression. The GH3 and GH5  
607 CAZyme families were also over-represented among the genes with a Roc1 binding site (Table S7).  
608 Both these glycoside hydrolase families comprise a diverse group of enzyme activities, several of  
609 which are involved in (hemi)cellulose degradation. GH3 includes members with reported  $\beta$ -  
610 glucosidase (involved in cellulose degradation) and xylan 1,4- $\beta$ -xylosidase (involved in  
611 hemicellulose degradation), while GH5 includes members with reported endo- $\beta$ -1,4-glucanase  
612 (involved in cellulose degradation)<sup>3,70</sup>. Combined, these activities may explain why the  $\Delta roc1$  strain  
613 can no longer utilize cellulose as a carbon source and displays slower growth on hemicellulose.

614 Remarkably, gene *roc1* itself is also associated with a Roc1 binding site (Table S6). This  
615 indicates that Roc1 regulates its own expression, perhaps in a positive feedback loop. Moreover,  
616 transcription factor genes in general are enriched among genes associated with a Roc1 binding site.  
617 Of the 296 transcription factor genes encoded in the genome, 52 had a nearby Roc1 binding site  
618 (Table S7). Few of these 52 transcription factors have been described previously, with the exception  
619 of C2h2 and Gat1, which play a role in various aspects of mushroom development<sup>71</sup>. It should be  
620 noted that these two genes were not up-regulated on cellulose or wood, when compared to growth  
621 on glucose.

622

## 623 **Conserved GC-rich motif in the Roc1 ChIP-Seq peaks**

624 The peaks identified in the ChIP-Seq analysis were analyzed to identify a conserved motif that  
625 represents the binding site of Roc1. The GC content of the 500 bp sequence around the top of each  
626 Roc1 peak was determined (Figure S6). There was a marked increase in GC content near the middle  
627 of the peaks, which indicates that the Roc1 binding site is GC-rich. Based on the GC curve, we further  
628 limited the search to 200 bp around the top of each Roc1 peak. The sequences were analyzed with  
629 STREME, which attempts to find conserved motifs that are over-represented in the peak sequences,  
630 compared to a representative negative set (i.e., other genomic sequences). This led to the identification  
631 of a GC-rich motif (Figure 5B) that was present in 989 of the 1427 peaks and significantly enriched  
632 compared to the negative control sequences ( $p = 2.8 \cdot 10^{-8}$  in a Fisher's exact test). Furthermore, this  
633 motif was found most frequently in the center of the identified peak (Figure 5C), as would be expected  
634 for the binding site.

635

### 636 **Functional promoter analysis of a CAZyme of the AA9 family reveals the Roc1 binding site**

637 Twelve of the 22 members of the lytic polysaccharide monooxygenase family (LPMOs; CAZyme family  
638 AA9) were up-regulated during growth on both cellulose and wood when compared to glucose.  
639 Moreover, Roc1 had direct binding sites in the promoters of 12 of the 22 LPMO genes, as determined  
640 by ChIP-Seq. Ten of the 22 LPMO genes were both up-regulated on cellulose and had a Roc1 ChIP-  
641 Seq peak in their promoter, which shows that there is a strong correlation between these. One of these  
642 genes, *lpmA* (protein ID 1190128), was strongly up-regulated on cellulose and wood, compared to  
643 growth on glucose (246 and 206-fold, respectively; Table S5). The peak from the Roc1 ChIP-Seq was  
644 located upstream of the translation start site (Figure 6A).

645 We performed a functional promoter analysis to further investigate the expression dynamics  
646 and to locate the transcription factor binding sites. The promoter of *lpmA* was used to drive expression  
647 of the red fluorescent reporter protein dTomato (Figure 6B). The 700 bp promoter (i.e., the 700 bp  
648 upstream of the predicted translation start site) could drive expression of dTomato when growing on  
649 cellulose, resulting in red fluorescent mycelium (strain *lpmA*<sub>prom700</sub>-*dTomato*; Figures 6C). No  
650 fluorescence was observed when grown on glucose or a combination of glucose and cellulose (Figure  
651 S7). Next, we produced similar reporter constructs with promoter lengths of 300, 200 and 100 bp. The  
652 promoter of 300 bp could still drive dTomato expression on cellulose, but, in contrast, the promoters of  
653 200 bp and 100 bp could not (Figures 6B and 6C). This indicates that the region between 300 and 200  
654 bp upstream of the translation start site contains an important regulatory element. This region  
655 corresponds with the peak in the ChIP-Seq data and therefore a binding site of Roc1. Moreover, the  
656 GC-rich conserved motif (Figure 5B) is located in this region (Figure 6A). This motif is also conserved  
657 in the promoters of the *lpmA* orthologs TattoneD and LoenenD (data not shown). Removal of this GC-  
658 rich motif from the 300 bp promoter of *lpmA* by site-directed mutagenesis resulted in a strong decrease  
659 in the ability of the promoter to drive dTomato expression (Figure 6C), since only weak fluorescence is  
660 observed. This confirms that the motif is indeed the binding site of Roc1 and that this binding site is  
661 required for correct promoter activity.

662

## 663 **DISCUSSION**

664 Fungal deconstruction of lignocellulose in the plant cell requires the complex orchestration of a broad  
665 set of enzymes, and the expression of these enzymes is generally tailored to the type of polymers  
666 in the substrate by transcription factors. Several such transcriptional regulators have been identified  
667 in the phylum Ascomycota, but to date not in the phylum Basidiomycota. These phyla diverged over  
668 600 million years ago<sup>1</sup>. Here, we identified the transcription factor Roc1 as a regulator of cellulase  
669 expression in the wood-decaying mushroom *Schizophyllum commune*. A *roc1* deletion strain cannot  
670 efficiently utilize cellulose (and, to a lesser extent, hemicellulose) as a carbon source. Moreover,  
671 ChIP-Seq revealed that Roc1 binds the promoters of various types of cellulase genes (including  
672 several lytic polysaccharide monooxygenases) while growing on cellulose, indicating that Roc1  
673 directly regulates those genes. Furthermore, Roc1 activates its own expression, likely in a positive  
674 feedback loop.

675 *S. commune* is a highly polymorphic basidiomycete, both phenotypically and genetically.  
676 Strains H4-8, TattoneD and LoenenD varied considerably in their growth profiles, and showed a high  
677 variation in their genomes. This extraordinary genetic diversity was previously shown for other strains  
678 of *S. commune* as well<sup>72</sup>. Despite the high level of sequence variation between the strains, the number  
679 of CAZyme genes was remarkably similar. Therefore, it is challenging to link the phenotypical  
680 differences in growth profiles to a signature in the genome. However, the comparative transcriptomics  
681 approach allowed us to detect conserved responses in the expression profile, despite the high strain  
682 diversity. Although there is considerable variation between how the strains change their expression  
683 profile to the various carbon sources, the expression profile of CAZymes is more conserved.  
684 Furthermore, although the response of transcription factors was generally less conserved than the  
685 response of CAZymes, we identified a single transcription factor gene (*roc1*) that was consistently up-  
686 regulated under these conditions in both strains.

687 Cellulose, cellobiose, and xylan are major constituents of lignocellulose in wood. Cellulose is  
688 a polysaccharide of  $\beta$ -1,4-linked glucose residues. Cellobiose is a dimer of  $\beta$ -1,4-linked glucose  
689 residues and is an intermediate breakdown product of cellulose during enzymatic digestion. Xylan is a  
690 group of hemicelluloses consisting of a backbone of  $\beta$ -1,4-linked xylose residues. The observation that  
691 growth on these carbon sources is specifically affected, but not on other carbon sources, is a strong  
692 indication that Roc1 regulates the process of lignocellulose degradation. Growth on pectin, another  
693 constituent of lignocellulose in wood, is not negatively affected in  $\Delta roc1$ . This indicates that Roc1 is  
694 likely not directly involved in pectinase expression.

695 It was previously shown that transcription factors involved in the regulation of  
696 polysaccharide degradation are generally poorly conserved between ascomycetes and  
697 basidiomycetes<sup>10</sup>, and this is also the case for Roc1. Even within the basidiomycetes, Roc1 is only  
698 conserved in the class Agaricomycetes. The majority of fungi in this class are wood-degrading<sup>5</sup>,  
699 although it also includes mycorrhizal and plant pathogenic fungi (some of which have a partially  
700 saprotrophic lifestyle). Inversely, wood-degrading fungi are predominantly found in the class  
701 Agaricomycetes. This correlation between lifestyle (lignocellulose-degrading) and the presence of a  
702 Roc1 ortholog suggests that the function of Roc1 may be conserved in other members of the  
703 Agaricomycetes as well.

704 Regulators of cellulases were previously identified in the distantly related ascomycete *N.*  
705 *crassa*<sup>15</sup>. It is important to note that these transcription factors (CLR-1 and CLR-2) are not  
706 orthologous to Roc1 of *S. commune*, nor are these two genes conserved in *S. commune*.  
707 Remarkably, however, the binding motifs of CLR-1 and Roc1 show a large degree of similarity. The  
708 binding motif of Roc1 (CCG-N-CGG) is part of the CLR-1 motif (CGG-N<sub>5</sub>-CCG-N-CGG). It is tempting  
709 to speculate that this is an example of convergent evolution, or that the binding motif predates either  
710 Roc1 or CLR-1. In the latter case, one transcription factor could have taken over the role of the other  
711 in an ancestor of ascomycetes and basidiomycetes. It should be noted, however, that binding motifs  
712 of regulators of the Zn<sub>2</sub>Cys<sub>6</sub> transcription factor family frequently contain a CCG triplet, as is also  
713 the case for Gal4 of *S. cerevisiae*<sup>67</sup>.

714 Orthologs of Roc1 in *Agaricus bisporus* (a litter-degrading, mushroom-forming fungus) and  
715 *Dichomitus squalens* (a white rot, mushroom-forming fungus) display an expression profile that is very  
716 similar to the profile in *S. commune*. In *A. bisporus* the ortholog of Roc1 is protein ID 224213 (version  
717 Agabi\_varbis\_H97\_2 of the genome annotation). Previously, whole-genome microarray expression  
718 data was published during growth on (glucose-rich) defined medium as well as on compost<sup>73</sup>. The  
719 expression of *roc1* was more than 10-fold higher when grown on compost (which contains large  
720 amounts of complex lignocellulosic carbon sources) than when grown on glucose-rich medium.  
721 Similarly, the ortholog of Roc1 in *D. squalens* is protein ID 920001 (version Dicsqu464\_1 of the genome  
722 annotation). Previously, whole-genome expression data was published during growth on cellulose  
723 (avicel) and on cellulose in combination with glucose<sup>74</sup>. Expression was considerably higher (more than  
724 6-fold) when grown on cellulose alone, when compared to when grown on a combination of glucose  
725 and cellulose. Although difficult to directly compare to our study, both these studies show that *roc1* in  
726 these fungi is down-regulated in glucose-rich medium, similar to the situation in *S. commune*.

727 Roc1 not only binds to promoters of cellulases, but also to promoters of several  
728 transcription factors. This suggests that Roc1 not only regulates lignocellulose degradation, but that  
729 it is also an important regulator of other downstream processes. While Roc1 ChIP-Seq revealed an  
730 enrichment of binding sites near lignocellulolytic CAZymes, the majority of putative binding sites  
731 were not in the promoter region of CAZymes or even genes up-regulated during growth on cellulose.  
732 It is currently not known what the role of Roc1 is in the regulation of these binding sites. A similar  
733 number of peaks has previously been reported for the Zn<sub>2</sub>Cys<sub>6</sub> transcription factor PRO1 in *Sordaria*  
734 *macrospora*<sup>75</sup>, while fewer peaks were reported for other Zn<sub>2</sub>Cys<sub>6</sub> transcription factors, including  
735 AflR in *Aspergillus flavus*<sup>76</sup>, CrzA in *Aspergillus fumigatus*<sup>77</sup> and FgHtf1 in *Fusarium graminearum*<sup>78</sup>.  
736 Since the consensus sequence of the binding motif is rather short, it seems likely that not every  
737 occurrence of the motif results in a change of gene expression after binding by Roc1. Identifying  
738 binding sites during growth on additional substrates, in combination with RNA-Seq, may reveal more  
739 insights into the role of Roc1 in regulating lignocellulose degradation.

740 This is the first report of ChIP-Seq with a specific transcription factor in a mushroom-forming  
741 fungus. It is a crucial step to mapping the regulatory networks of transcription factors in this group of  
742 fungi, since direct interactions between transcription factors and promoters can now be revealed in vivo.



743 This will also be useful for studying the direct targets of the transcription factors involved in mushroom  
744 development<sup>19,21,71,79</sup> and other processes in this important group of fungi.

745

746

#### 747 **DATA AVAILABILITY**

748 All genome assemblies and annotations can be interactively accessed through the JGI fungal genome  
749 portal MycoCosm<sup>29</sup> at <http://mycocosm.jgi.doe.gov>. The data are also deposited in  
750 DDBJ/EMBL/GenBank under the following accessions numbers [*submission in progress, will be*  
751 *released upon publication*] for *S. commune* H4-8 (version Schco3), [*submission in progress, will be*  
752 *released upon publication*] for *S. commune* TattoneD (version Schco\_TatD\_1), and [*submission in*  
753 *progress, will be released upon publication*] for *S. commune* LoenenD (version Schco\_LoeD\_1).

754 The RNA Sequencing reads have been deposited in the NCBI Short Read Archive under project IDs  
755 SRP048482 (strain H4-8 on various carbon sources) and SRP053470 (strain TattoneD on various  
756 carbon sources). The ChIP-Seq reads have been deposited in the NCBI Short Read Archive under  
757 bioproject ID PRJNA726034.

758

#### 759 **ACKNOWLEDGEMENTS**

760 The work conducted by the U.S. Department of Energy Joint Genome Institute, a DOE Office of Science  
761 User Facility, is supported by the Office of Science of the U.S. Department of Energy under Contract  
762 No. DE-AC02-05CH11231. This project has received funding from the European Research Council  
763 (ERC) under the European Union's Horizon 2020 research and innovation programme (grant  
764 agreement number 716132). We thank Utrecht Sequencing Facility for providing sequencing service  
765 and data for the ChIP-Seq analysis. Utrecht Sequencing Facility is subsidized by the University Medical  
766 Center Utrecht, Hubrecht Institute, Utrecht University and The Netherlands X-omics Initiative (NWO  
767 project 184.034.019). We thank Steven Ahrendt for technical assistance with data submission to  
768 GenBank.

769

#### 770 **AUTHOR CONTRIBUTIONS**

771 Performed experiments and analyzed the data: IMM, PJV, IDV, BB, AC, CD, HL, AL, HP, MBPS, MT,  
772 AT, JS, JG, LGG, RAO. Supervision/coordination of experiments: KB, JG, LGG, IGC, HABW, IVG,  
773 RAO. Wrote the manuscript: IMM, PJV, IDV, RAO. Provided funding: IGC, HABW, IVG, RAO.  
774 Conceived the project: RAO. Read and approved the manuscript: all authors

775

#### 776 **COMPETING INTERESTS**

777 The authors report no competing interests.

778

779

780

781



782 **FIGURES**

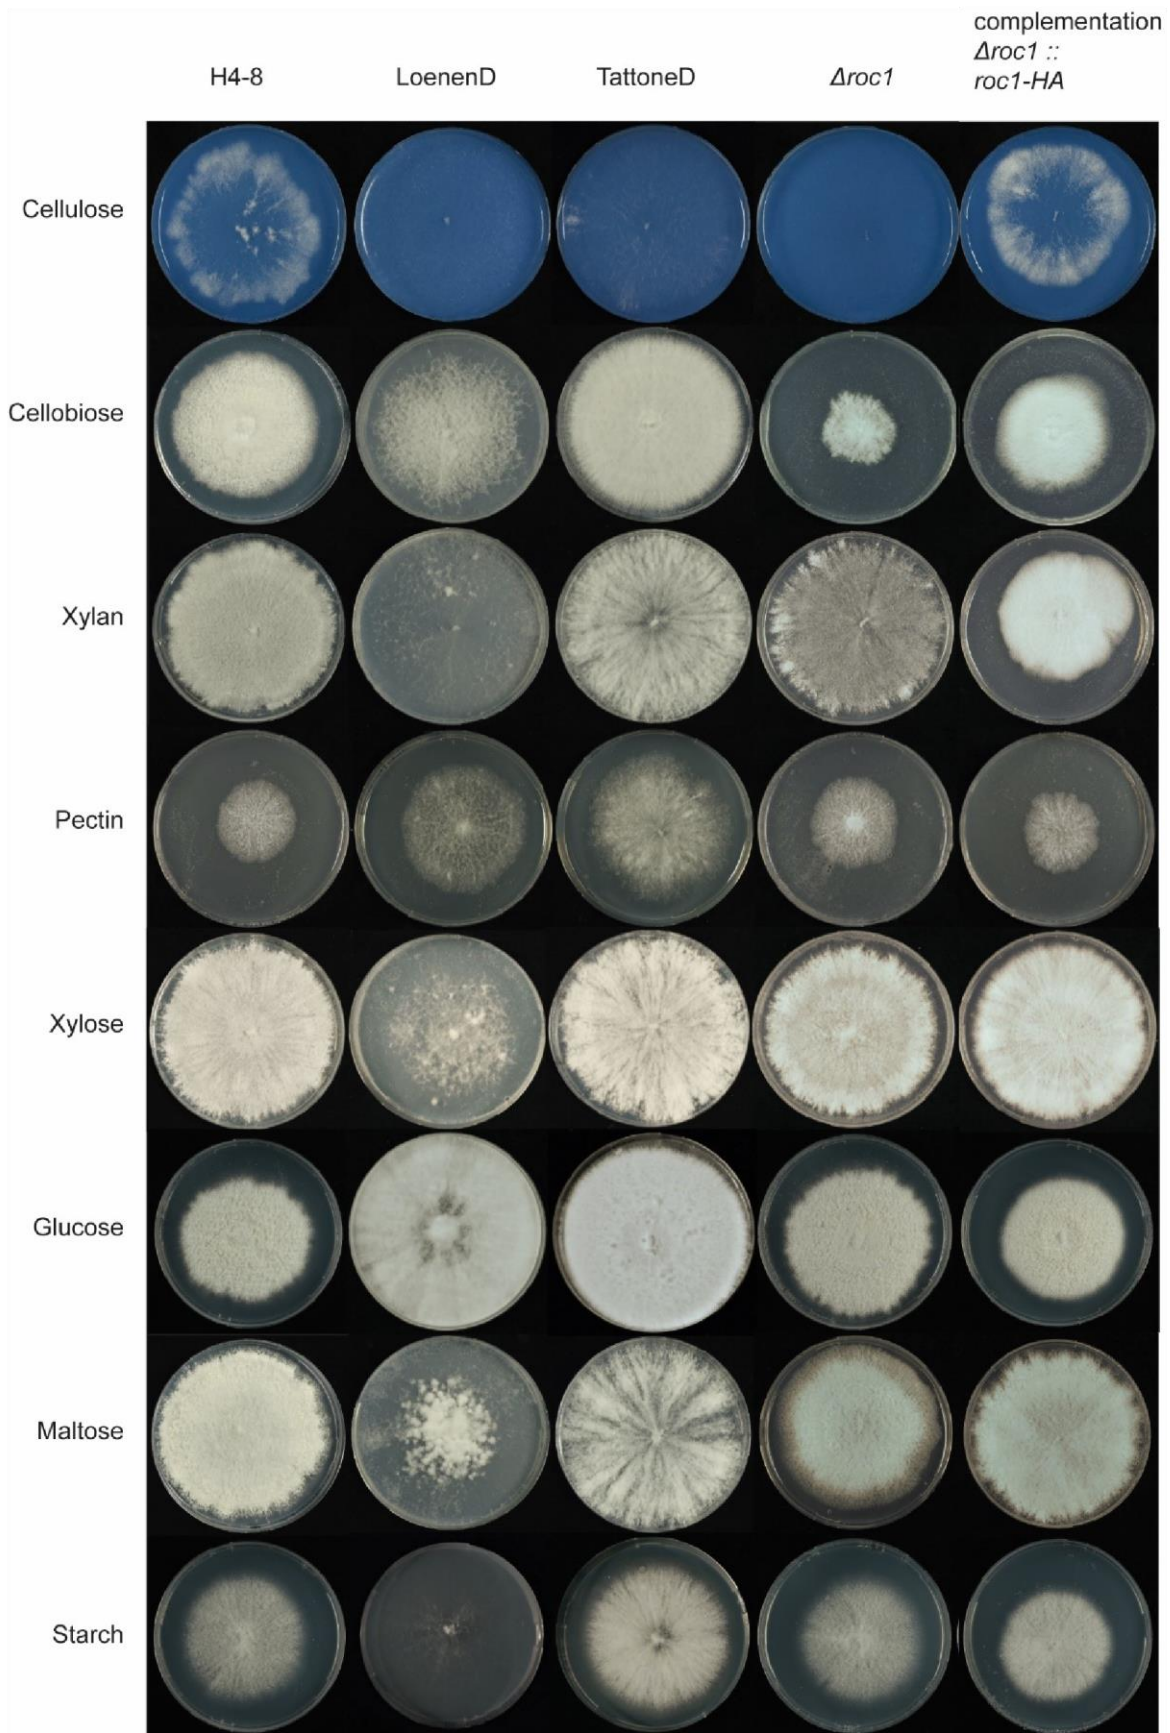

783

784 **Figure 1:** Growth phenotype of *S. commune* strains on various carbon sources. Reference strain H4-8  
785 and wild isolate strains LoenenD and TattoneD displayed high phenotypic plasticity regarding growth  
786 on these carbon sources. Strain LoenenD showed reduced growth on maltose, starch, xylose, xylan  
787 and cellulose (Avicel), but improved growth on pectin and cellobiose compared to the reference strain  
788 H4-8. In contrast, the growth profile of strain TattoneD was more similar to that of strain H4-8, with the  
789 notable exceptions of cellulose (TattoneD grew slower than H4-8) and pectin (TattoneD grew faster  
790 than H4-8). Deletion strain  $\Delta roc1$  showed strongly reduced growth on cellulose and cellobiose, when  
791 compared to its parent strain H4-8. This phenotype was rescued when the deletion was complemented.  
792 All strains were grown from a point inoculum for 7 days (glucose) and 11 days (other carbon sources)  
793 at 30°C. The cellulose medium was stained blue with Remazol Brilliant Blue R to enhance the visibility  
794 of the white mycelium on the white cellulose medium (the dye did not affect growth; data not shown).  
795

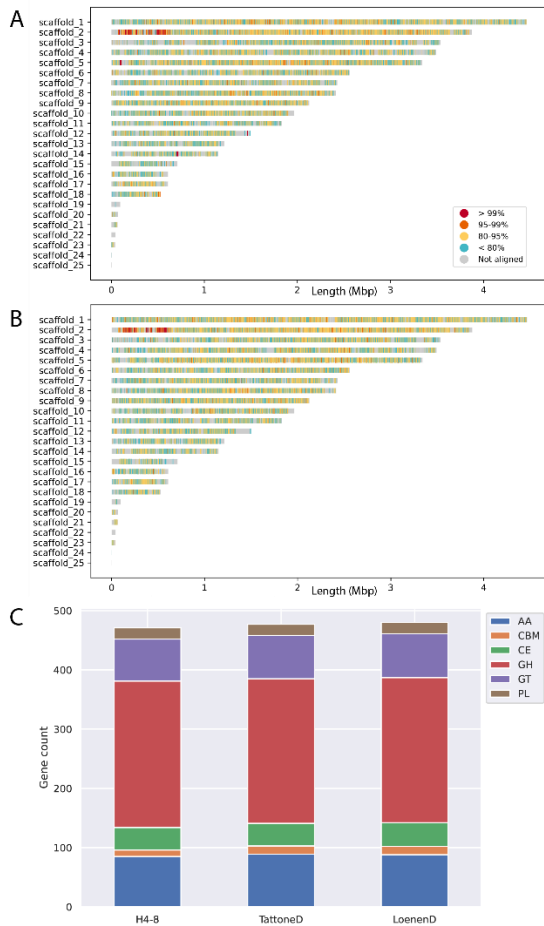

796

797 **Figure 2.** Conservation between the reference assembly of strain H4-8 and the assemblies of strains  
798 (A) Tattoned and (B) LoenenD. Even though these are strains of the same species, their assemblies  
799 display a high degree of variation. C. The number of predicted genes involved with plant cell wall  
800 degradation is very similar between the strains. These CAZymes are classified in subfamilies. GH:  
801 Glycoside Hydrolases; GT: Glycosyl Transferases; PL: Polysaccharide Lyases; CE: Carbohydrate  
802 Esterases; AA: Auxiliary Activities; CBM: carbohydrate-binding modules

803

804

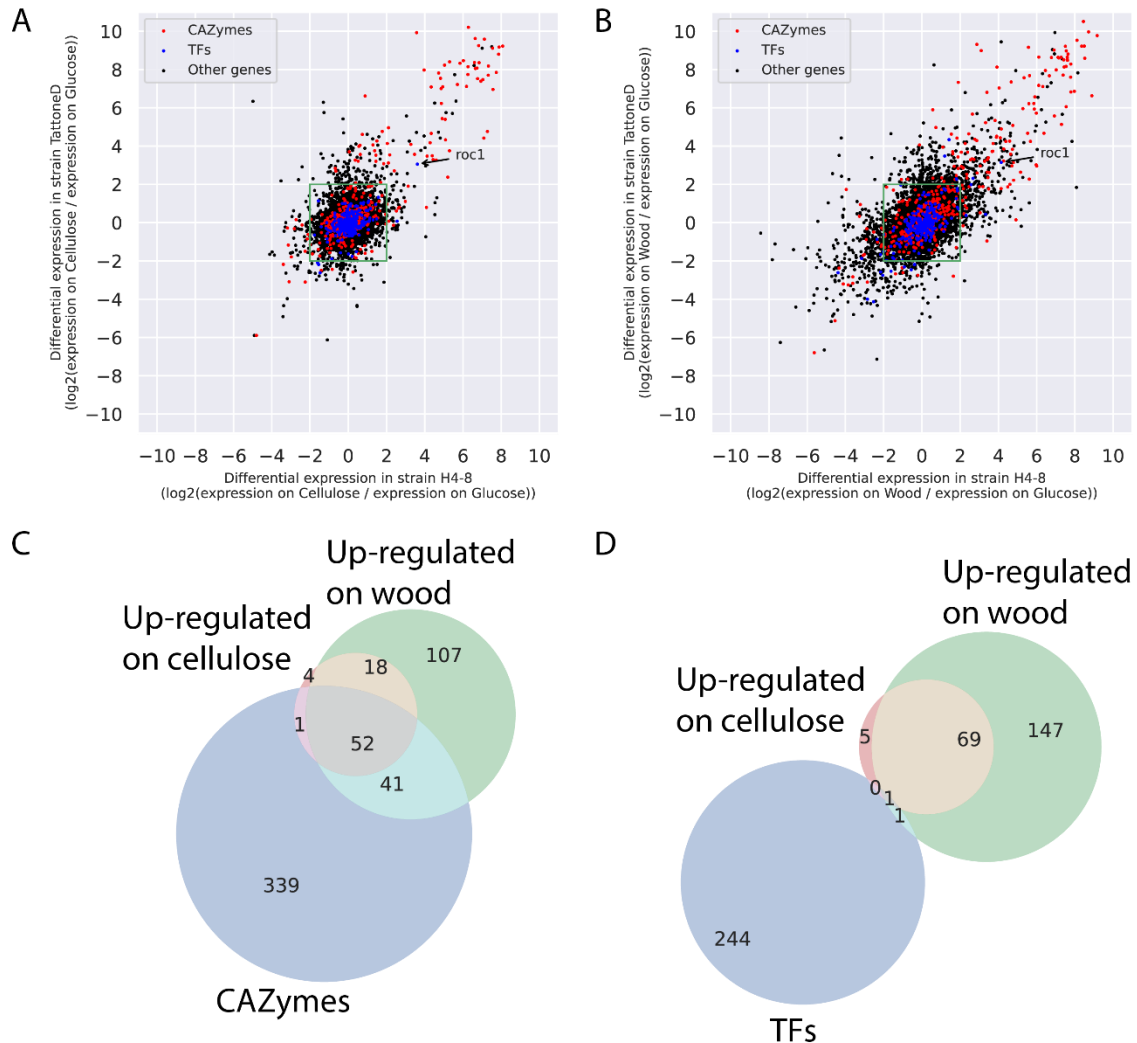

805

806 **Figure 3.** Comparative transcriptomics in strains H4-8 and TattonedD. **A.** Expression of orthologs in the  
 807 two strains when grown on cellulose, compared to glucose. Orthologs in the green box are not  
 808 differentially expressed in either strain. Orthologs in the top right quadrant are up-regulated on cellulose  
 809 in both strains, indicating that they show a conserved response. Many of these orthologs are CAZymes,  
 810 and only one ortholog is a transcription factor (*roc1*). In general, the response of CAZymes is more  
 811 conserved than that of other genes **B.** As in (A), but expression on wood when compared to glucose.  
 812 **C.** VENN diagram of orthologs that are annotated as a CAZyme, are up-regulated on cellulose in both  
 813 strains, or are up-regulated on wood in both strains (when compared to on glucose). Orthologs that are  
 814 up-regulated on cellulose in both strains are largely a subset of orthologs up-regulated on wood.  
 815 Moreover, a considerable number of the up-regulated orthologs are annotated as CAZyme. **D.** As in  
 816 (C), but for orthologs annotated as transcription factors. Only one transcription factor (*roc1*) was up-  
 817 regulated in both strains on both cellulose and wood.

818

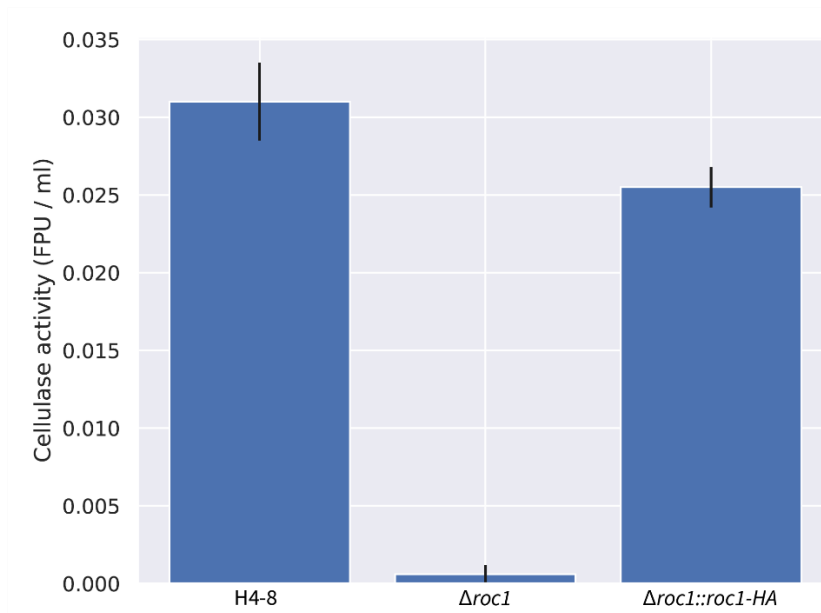

819

820 **Figure 4.** Total cellulase activity of *S. commune* strains in cellulose liquid shaking cultures. There is  
821 almost no activity in the  $\Delta roc1$  strain when compared to the reference H4-8. This phenotype is largely  
822 rescued upon complementation of the gene. All cultures were pre-grown on glucose medium to ensure  
823 that sufficient biomass was present, transferred to cellulose medium, and grown for 6 additional days.

824

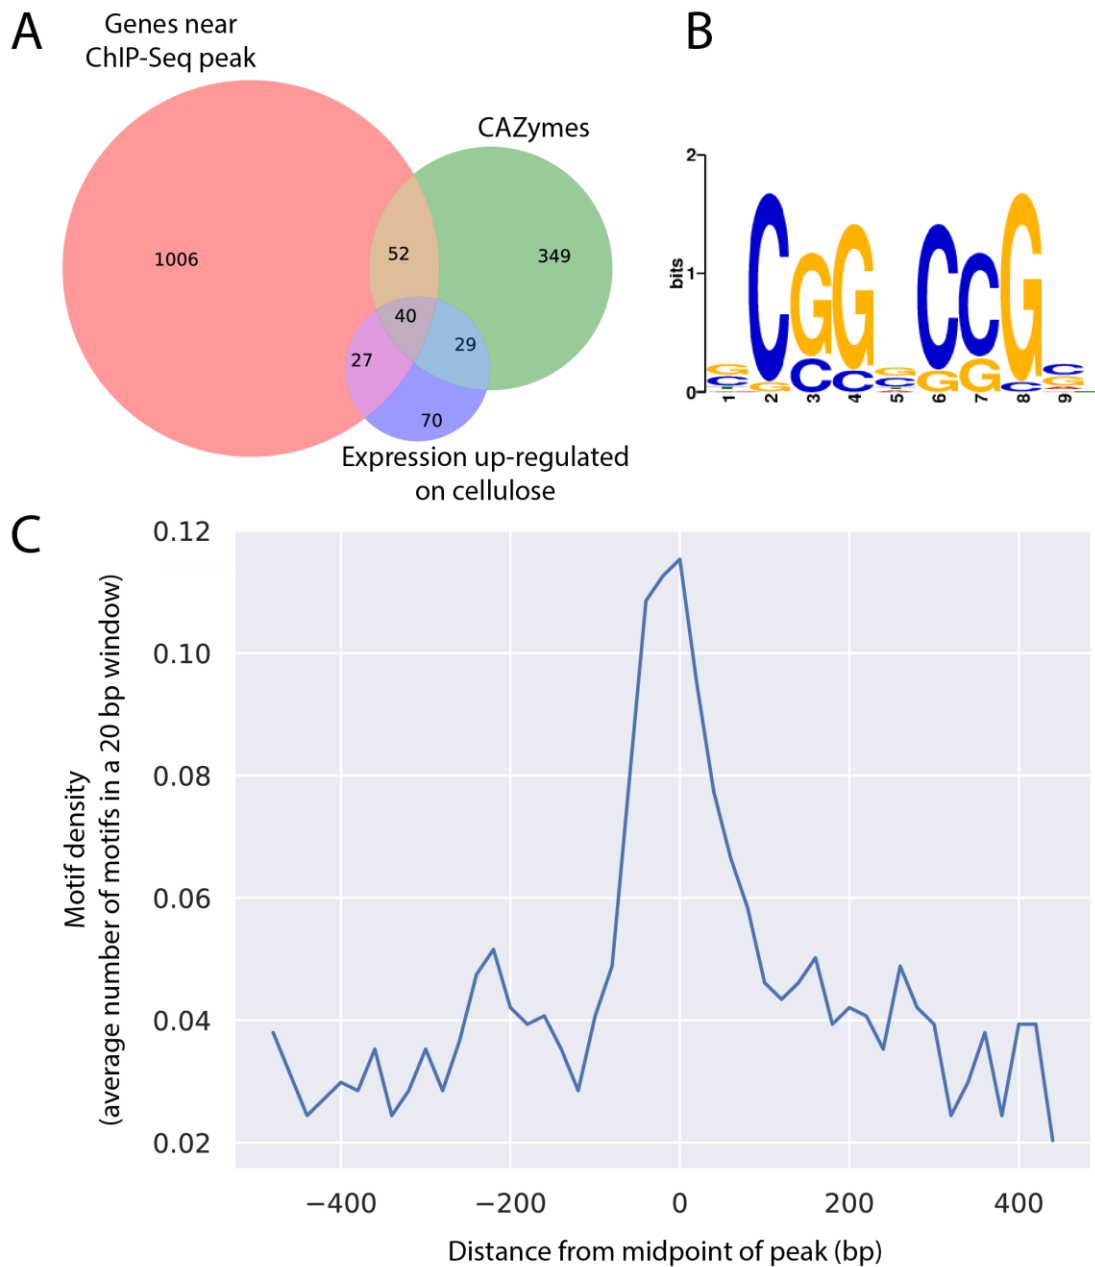

825

826 **Figure 5. A.** Venn diagram depicting the overlap between the sets of genes that are associated with  
827 a Roc1 binding site, CAZymes, and genes that are up-regulated on cellulose (when compared to  
828 glucose). **B.** Conserved motif identified in the binding sites of Roc1. **C.** The binding site in (B) is  
829 enriched in the center of the ChIP-Seq peaks.

830



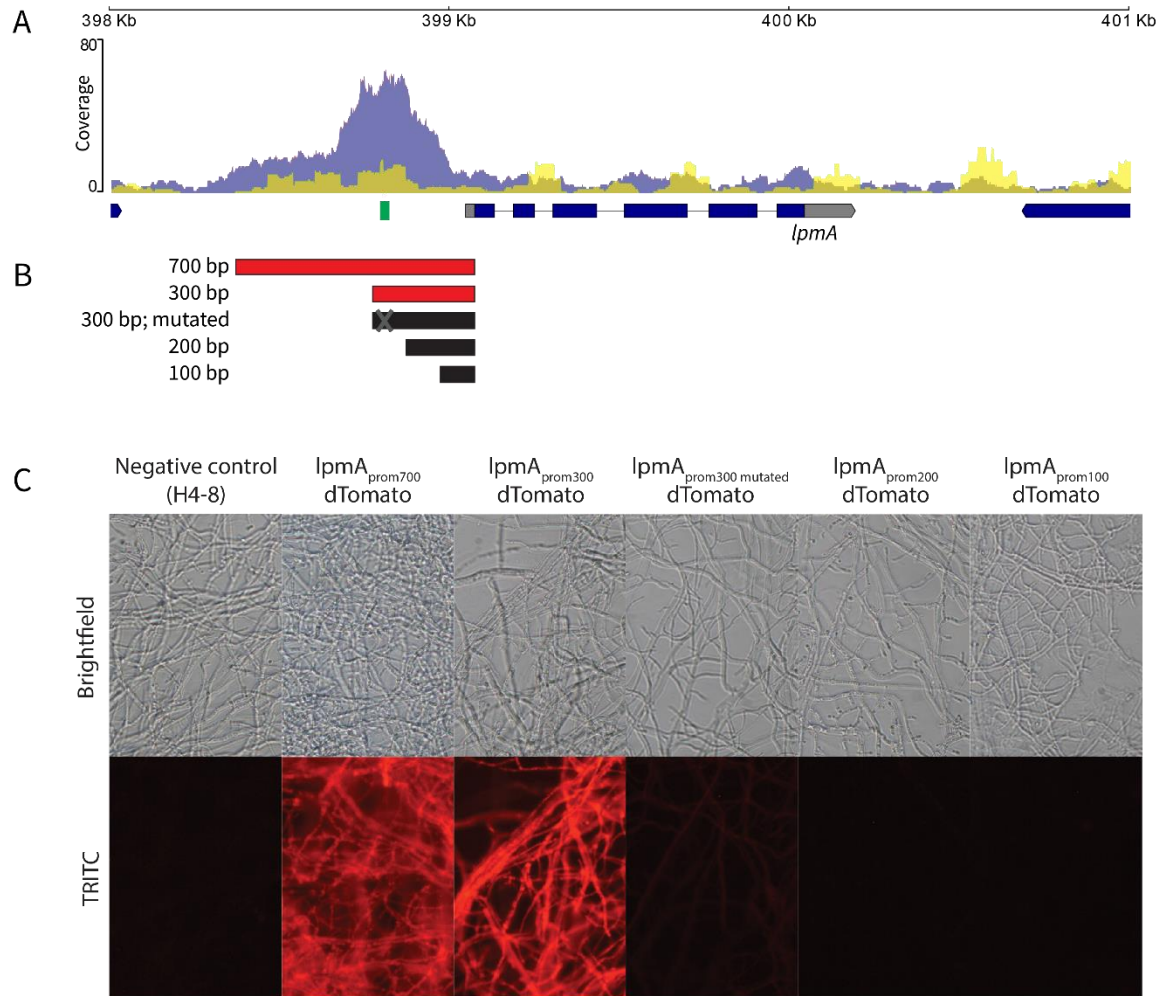

831  
832 **Figure 6.** Functional promoter analysis of the lytic polysaccharide monoxygenase *lpmA* gene  
833 (protein ID 1190128). **A.** ChIP-Seq read coverage curve in the locus of *lpmA*. The blue curve  
834 represents the coverage of the Roc1 ChIP-Seq reads, while the yellow curve represents the negative  
835 control. There is a peak in the promoter region up-stream of the *lpmA* coding sequence. The location  
836 of the conserved motif (representing the Roc1 binding site; Figure 5B) is indicated in green. **B.** Five  
837 regions in the promoter of *lpmA* (5' of the coding sequence) were tested for their ability to drive  
838 expression and fluorescence of dTomato. Active promoter fragments are indicated in red, and inactive  
839 promoter fragments in black. **C.** Reporter strains with the dTomato gene under control of the  
840 promoters in (B), grown on cellulose. The 700 and 300 bp promoters can drive dTomato expression  
841 and fluorescence, but the 200 and 100 bp promoters cannot. The 300 bp promoter in which the Roc1  
842 binding motif had been mutated was not able to drive dTomato expression and fluorescence to the  
843 same extent, since only weak fluorescence is observed. When grown on glucose, no fluorescence  
844 was observed in any of these strains (Figure S7).

845  
846  
847

848 **SUPPLEMENTARY TABLES**

849

850 **Table S1.** The species used in this study and their Roc1 orthologs. The previously published genome  
851 and genes were obtained from the indicated publications. The indicated phylogeny is based on the  
852 NCBI taxonomy database<sup>80</sup>.

853

854 **Table S2.** Primer used in this study.

855

856 **Table S3.** Statistics of the assemblies and gene predictions. For strain H4-8 an updated assembly and  
857 annotation were generated (version Schco3). Strains TattoneD and LoenenD were newly sequenced  
858 for this study.

859

860 **Table S4.** Genes encoding carbohydrate-active enzymes (CAZymes) in the three strains of *S.*  
861 *commune*.

862

863 **Table S5.** Expression values of genes (in RPKM) of strains H4-8 (first tab in the Excel file) and TattoneD  
864 (second tab) on medium containing either glucose, cellulose or wood as sole carbon source. Functional  
865 annotations of the genes are given. For each comparison of two growth conditions, three columns are  
866 given to describe the differential expression: the q-value (calculated by Cuffdiff), the log<sub>2</sub> of the ratio of  
867 expression values (after increasing those with 1 to avoid division by zero issues), and whether or not  
868 the differential expression may be considered biologically relevant (indicated with 'yes' if the q-value is  
869 lower than 0.05, and the fold-change is at least 4, and at least one of the two conditions in question has  
870 an expression value of at least 10 RPKM).

871

872 **Table S6.** Locations of the peaks identified in the ChIP-Seq analysis. These peaks can be regarded as  
873 Roc1 binding sites. The genes associated with these peaks, as well as information about their  
874 annotation and expression profile are indicated.

875

876 **Table S7.** Enrichment of functional annotation terms among genes associated with a Roc1 binding site.

877

878

879 **SUPPLEMENTARY FIGURES**

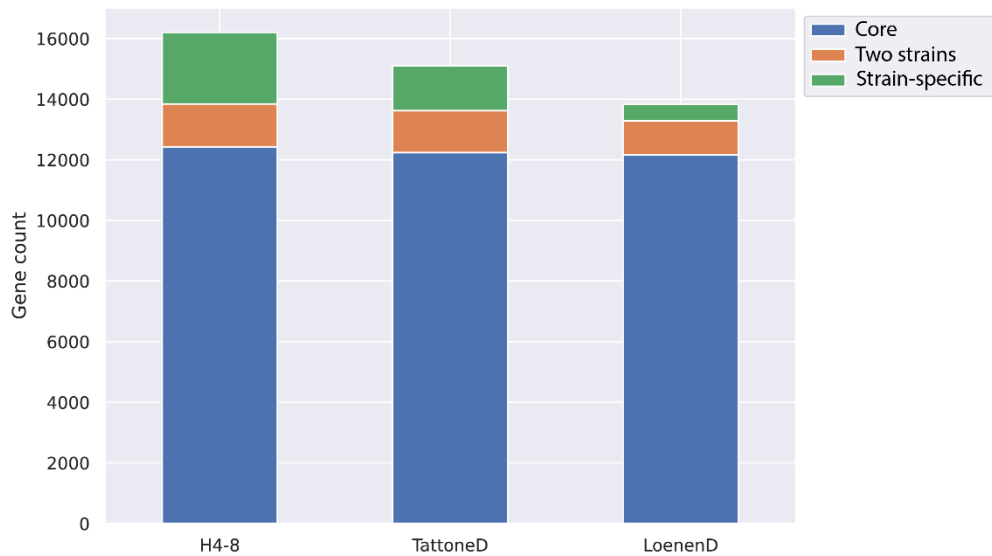

880

881 **Figure S1.** The number of predicted genes per strain and their conservation. The conservation was  
882 determined with Orthofinder. Genes in an orthogroup that had members from all three strains were  
883 labeled as 'core', genes in orthogroups that had members from two strains were labeled as 'two strains',  
884 and the remaining genes were labeled as 'strain-specific'.

885

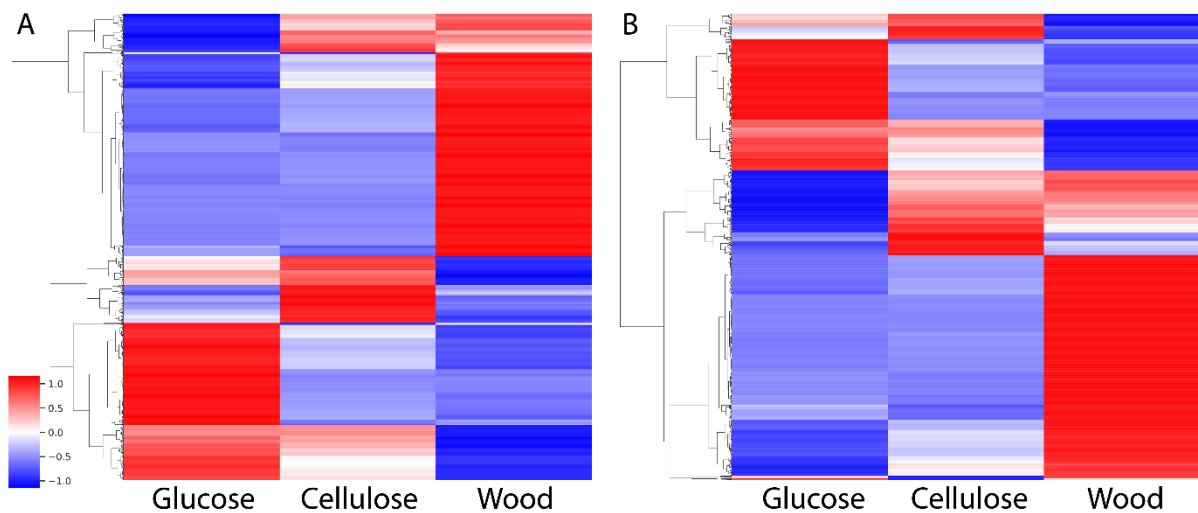

886

887 **Figure S2.** Heat map of gene expression during growth on either glucose, cellulose or wood as sole  
888 carbon source. Only genes that are differentially expressed between at least two conditions are  
889 depicted. The expression values were z-transformed, resulting in a z-score. All expression values are  
890 in Table S4. **A.** Strain H4-8. **B.** Strain TattoneD.

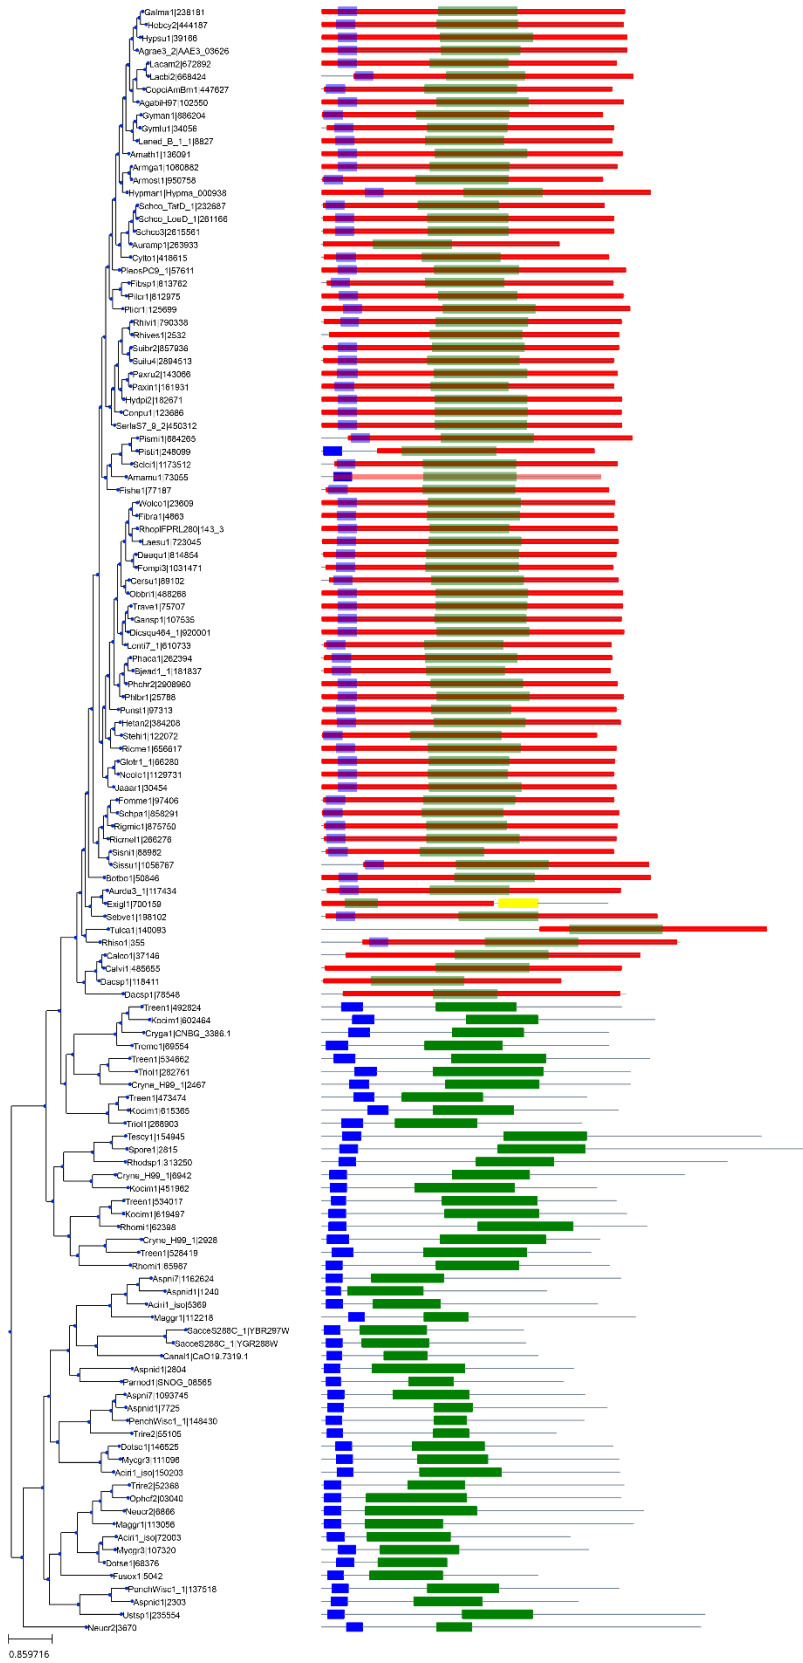

892 **Figure S3.** Gene tree of Roc1 orthologs and more distant homologs. The locations of the PFAM  
893 domains PF00172 (Zn<sub>2</sub>Cys<sub>6</sub> binuclear cluster domain) and PF04082 (Fungal specific transcription factor  
894 domain) are indicated in blue and green, respectively. The location of a conserved Roc1 HMM domain  
895 is indicated in red. A protein is indicated as a Roc1 ortholog if the blue, green and red domains are  
896 present, whereas other proteins in this tree are considered more distant homologs. Branch lengths  
897 between the Roc1 orthologs are generally considerably shorter than the branch lengths between the  
898 more distant homologs. Roc1 orthologs are only found in Agaricomycetes (Figure S4). The first part of  
899 the protein IDs represents a species code (see Table S1 for the full species name).  
900

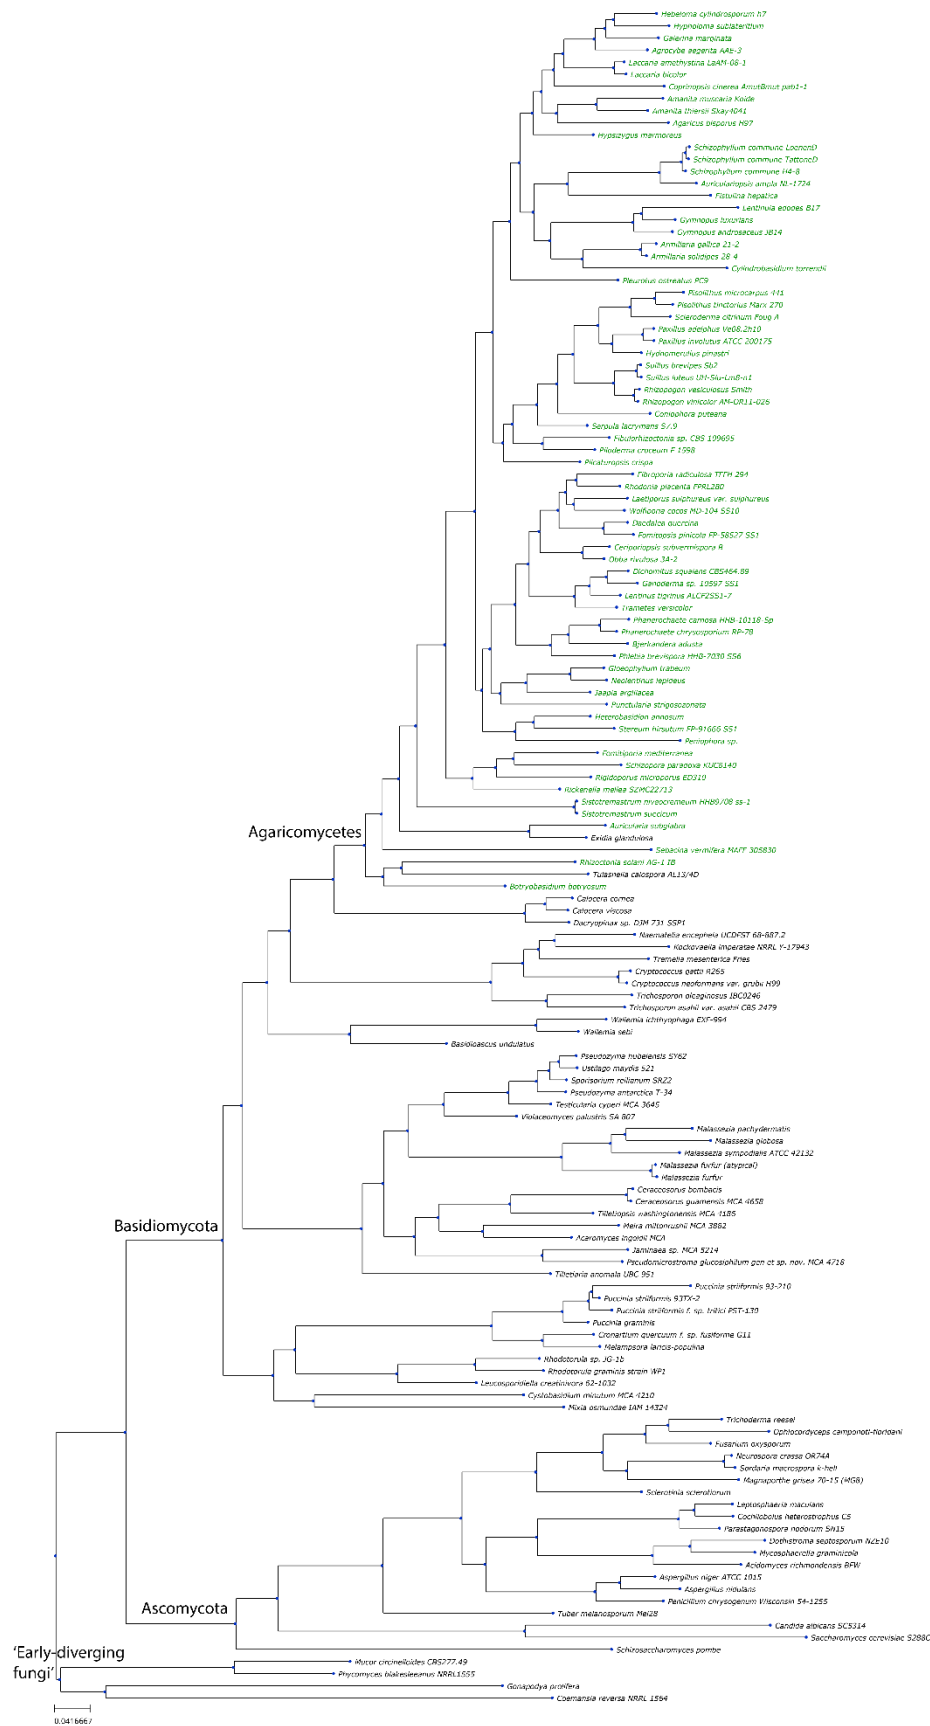

901



902 **Figure S4.** Species tree of 140 fungal species. The species with a putative Roc1 ortholog are indicated  
903 in green. Roc1 is only conserved in the Agaricomycetes. See Table S1 and Figure S3 for the protein  
904 IDs of the Roc1 orthologs.

905  
906  
907

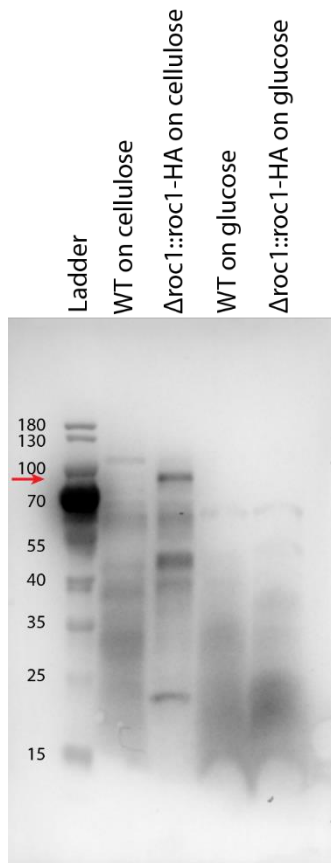

908  
909 **Figure S5:** Western Blot confirms the expression of the HA-tagged Roc1 protein. The wild type (i.e.  
910 reference strain H4-8) and  $\Delta roc1::roc1$ -HA (i.e. the deletion strain complemented with the gene  
911 encoding the HA-tagged Roc1) were grown on cellulose or glucose. The predicted size of the HA-  
912 tagged Roc1 protein is 78.9 kDa. A band of this size is visible in the complemented deletion strain  
913 when grown on cellulose, but not when grown on glucose (the height of the band is indicated with a red arrow).  
914 As expected, this band is not found in the wild type strain under either condition.

915

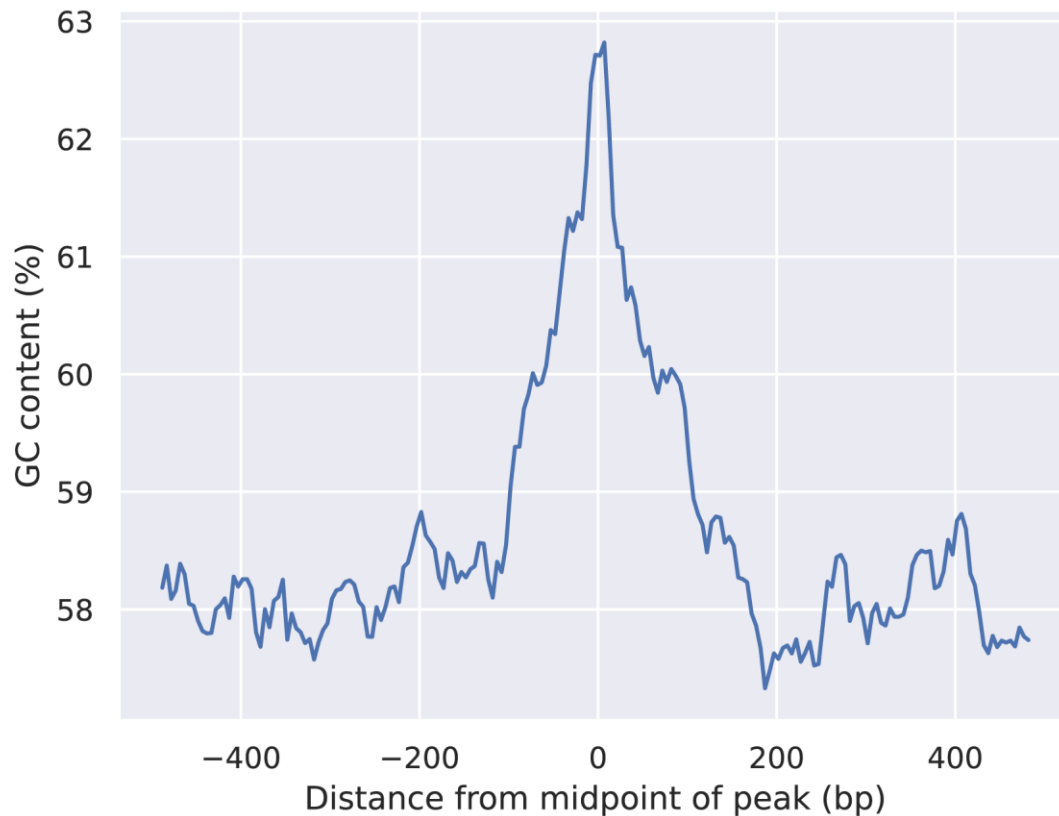

916

917 **Figure S6.** GC content along the length of the 1427 ChIP-Seq peaks. Around the midpoint of the peaks  
918 there is an increase of the GC content, which indicates that the Roc1 binding motif is GC-rich.

919

920

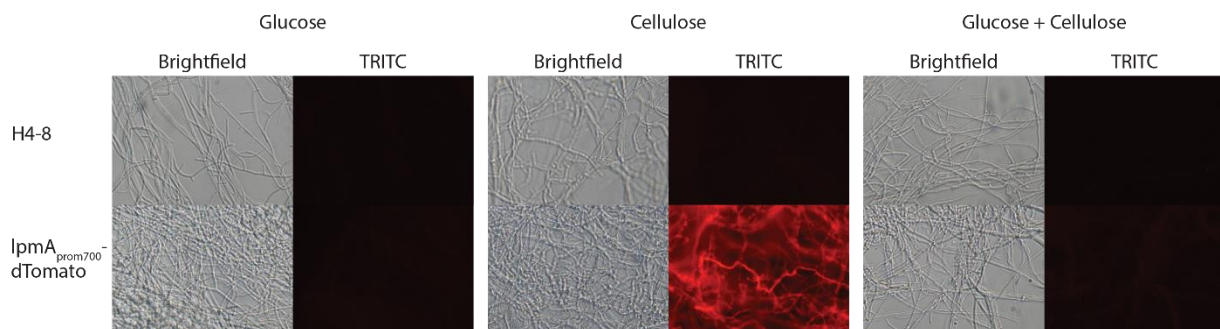

921

922 **Figure S7.** Fluorescence of dTomato driven by the 700 bp promoter of *lpmA*. When grown on glucose,  
923 no fluorescence is observed. In contrast, when grown on cellulose strong fluorescence is observed, in  
924 concordance with the expression profile of *lpmA*. When grown on a mix of glucose and cellulose, no  
925 fluorescence is observed, indicating the carbon catabolite repression overrules the induction by  
926 cellulose. In the reference strain H4-8, no fluorescence is observed under any condition.

927

928

929 **References**

- 930 1. Floudas, D. *et al.* The Paleozoic origin of enzymatic lignin decomposition reconstructed from  
931 31 fungal genomes. *Science (New York, N.Y.)* **336**, 1715–9 (2012).
- 932 2. Levasseur, A., Drula, E., Lombard, V., Coutinho, P. M. & Henrissat, B. Expansion of the enzymatic  
933 repertoire of the CAZy database to integrate auxiliary redox enzymes. *Biotechnology for*  
934 *Biofuels* **6**, 41 (2013).
- 935 3. Lombard, V., Golaconda Ramulu, H., Drula, E., Coutinho, P. M. & Henrissat, B. The  
936 carbohydrate-active enzymes database (CAZy) in 2013. *Nucleic Acids Research* **42**, D490–D495  
937 (2014).
- 938 4. Riley, R. *et al.* Extensive sampling of basidiomycete genomes demonstrates inadequacy of the  
939 white-rot/brown-rot paradigm for wood decay fungi. *Proceedings of the National Academy of*  
940 *Sciences* **111**, 9923 LP – 9928 (2014).
- 941 5. Ohm, R. A. *et al.* Genomics of wood-degrading fungi. *Fungal Genetics and Biology* **72**, 82–90  
942 (2014).
- 943 6. Almási, É. *et al.* Comparative genomics reveals unique wood-decay strategies and fruiting body  
944 development in the Schizophyllaceae. *New Phytologist* **224**, (2019).
- 945 7. Zhang, J., Silverstein, K. A. T., Castaño, J. D., Figueroa, M. & Schilling, J. S. Gene Regulation Shifts  
946 Shed Light on Fungal Adaption in Plant Biomass Decomposers. *mBio* **10**, e02176-19 (2019).
- 947 8. Strauss, J. *et al.* The function of CreA, the carbon catabolite repressor of *Aspergillus nidulans*,  
948 is regulated at the transcriptional and post-transcriptional level. *Molecular Microbiology* **32**,  
949 169–178 (1999).
- 950 9. Portnoy, T. *et al.* The CRE1 carbon catabolite repressor of the fungus *Trichoderma reesei*: a  
951 master regulator of carbon assimilation. *BMC Genomics* **12**, 269 (2011).
- 952 10. Todd, R. B. *et al.* Prevalence of transcription factors in ascomycete and basidiomycete fungi.  
953 *BMC Genomics* **15**, 214 (2014).
- 954 11. Yoav, S. *et al.* Effects of cre1 modification in the white-rot fungus *Pleurotus ostreatus* PC9:  
955 Altering substrate preference during biological pretreatment. *Biotechnology for Biofuels* **11**,  
956 212 (2018).
- 957 12. van Peij, N. N. M. E., Gielkens, M. M. C., de Vries, R. P., Visser, J. & de Graaff, L. H. The  
958 Transcriptional Activator XlnR Regulates Both Xylanolytic and Endoglucanase Gene Expression  
959 in *Aspergillus niger*. *Applied and Environmental Microbiology* **64**, 3615 LP – 3619 (1998).
- 960 13. Stricker, A. R., Grosstessner-Hain, K., Würleitner, E. & Mach, R. L. Xyr1 (Xylanase Regulator 1)  
961 Regulates both the Hydrolytic Enzyme System and -Xylose Metabolism in *Hypocrea jecorina*.  
962 *Eukaryotic Cell* **5**, 2128 LP – 2137 (2006).
- 963 14. Benocci, T., Aguilar-Pontes, M. V., Zhou, M., Seiboth, B. & de Vries, R. P. Regulators of plant  
964 biomass degradation in ascomycetous fungi. *Biotechnology for Biofuels* **10**, 152 (2017).
- 965 15. Craig, J. P., Coradetti, S. T., Starr, T. L. & Glass, N. L. Direct Target Network of the *Neurospora*  
966 *crassa* Plant Cell Wall Deconstruction Regulators CLR-1, CLR-2, and XLR-1. *mBio* **6**, e01452-15  
967 (2015).
- 968 16. Aro, N., Ilmén, M., Saloheimo, A. & Penttilä, M. ACEI of *Trichoderma reesei* is a repressor of  
969 cellulase and xylanase expression. *Applied and Environmental Microbiology* **69**, 56 LP – 65  
970 (2003).
- 971 17. Vonk, P. J., Escobar, N., Wösten, H. A. B., Lugones, L. G. & Ohm, R. A. High-throughput targeted  
972 gene deletion in the model mushroom *Schizophyllum commune* using pre-assembled Cas9  
973 ribonucleoproteins. *Scientific Reports 2019 9:1* **9**, 7632 (2019).
- 974 18. de Jong, J. F., Ohm, R. A., de Bekker, C., Wösten, H. A. B. & Lugones, L. G. Inactivation of ku80  
975 in the mushroom-forming fungus *Schizophyllum commune* increases the relative incidence of  
976 homologous recombination. *FEMS Microbiology Letters* **310**, 91–95 (2010).
- 977 19. Vonk, P. J. & Ohm, R. A. H3K4me2 ChIP-Seq reveals the epigenetic landscape during mushroom  
978 formation and novel developmental regulators of *Schizophyllum commune*. *Scientific Reports*  
979 **11**, 8178 (2021).

- 980 20. Floudas, D. *et al.* Evolution of novel wood decay mechanisms in Agaricales revealed by the  
981 genome sequences of *Fistulina hepatica* and *Cylindrobasidium torrendii*. *Fungal Genetics and*  
982 *Biology* **76**, 78–92 (2015).
- 983 21. Ohm, R. A. *et al.* Genome sequence of the model mushroom *Schizophyllum commune*. *Nature*  
984 *Biotechnology* **28**, 957–963 (2010).
- 985 22. van Peer, A. F., de Bekker, C., Vinck, A., Wösten, H. A. B. & Lugones, L. G. Phleomycin increases  
986 transformation efficiency and promotes single integrations in *schizophyllum commune*.  
987 *Applied and Environmental Microbiology* **75**, 1243–1247 (2009).
- 988 23. Dons, J. J. M., de Vries, O. M. H. & Wessels, J. G. H. Characterization of the genome of the  
989 basidiomycete *Schizophyllum commune*. *Biochimica et Biophysica Acta (BBA) - Nucleic Acids*  
990 *and Protein Synthesis* **563**, 100–112 (1979).
- 991 24. Gordon, D., Desmarais, C. & Green, P. Automated Finishing with Autofinish. *Genome Research*  
992 **11**, 614–625 (2001).
- 993 25. Gordon, D. Viewing and Editing Assembled Sequences Using Consed. *Current Protocols in*  
994 *Bioinformatics* **2**, 11.2.1-11.2.43 (2003).
- 995 26. Zerbino, D. R. & Birney, E. Velvet: algorithms for de novo short read assembly using de Bruijn  
996 graphs. *Genome research* **18**, 821–9 (2008).
- 997 27. Gnerre, S. *et al.* High-quality draft assemblies of mammalian genomes from massively parallel  
998 sequence data. *Proceedings of the National Academy of Sciences of the United States of*  
999 *America* **108**, 1513–1518 (2011).
- 1000 28. Grigoriev, I. v, Martinez, D. A. & Salamov, A. A. 5 - Fungal Genomic Annotation. in *Applied*  
1001 *Mycology and Biotechnology* (eds. Arora, D. K., Berka, R. M. & Singh, G. B. B. T.-A. M. and B.)  
1002 vol. 6 123–142 (Elsevier, 2006).
- 1003 29. Grigoriev, I. v. *et al.* MycoCosm portal: gearing up for 1000 fungal genomes. *Nucleic Acids*  
1004 *Research* **42**, D699–D704 (2014).
- 1005 30. Smit, A. F. A., Hubley, R. & Green, P. RepeatMasker Open-4.0 2013-2015.  
1006 <http://www.repeatmasker.org> (2015).
- 1007 31. Jurka, J. *et al.* Repbase Update, a database of eukaryotic repetitive elements. *Cytogenetic and*  
1008 *genome research* **110**, 462–7 (2005).
- 1009 32. Price, A. L., Jones, N. C. & Pevzner, P. A. De novo identification of repeat families in large  
1010 genomes. *Bioinformatics* **21**, i351–i358 (2005).
- 1011 33. Salamov, A. A. & Solovyev, V. v. Ab initio Gene Finding in Drosophila Genomic DNA. *Genome*  
1012 *Research* **10**, 516–522 (2000).
- 1013 34. Ter-Hovhannisyan, V., Lomsadze, A., Chernoff, Y. O. & Borodovsky, M. Gene prediction in novel  
1014 fungal genomes using an ab initio algorithm with unsupervised training. *Genome Research* **18**,  
1015 1979–1990 (2008).
- 1016 35. Birney, E., Clamp, M. & Durbin, R. GeneWise and Genomewise. *Genome research* **14**, 988–95  
1017 (2004).
- 1018 36. Lowe, T. M. & Eddy, S. R. tRNAscan-SE: A Program for Improved Detection of Transfer RNA  
1019 Genes in Genomic Sequence. *Nucleic Acids Research* **25**, 955–964 (1997).
- 1020 37. El-Gebali, S. *et al.* The Pfam protein families database in 2019. *Nucleic Acids Research* **47**, D427–  
1021 D432 (2018).
- 1022 38. Ashburner, M. *et al.* Gene Ontology: tool for the unification of biology. *Nature Genetics* **25**, 25–  
1023 29 (2000).
- 1024 39. Hunter, S. *et al.* InterPro: the integrative protein signature database. *Nucleic Acids Research*  
1025 **37**, D211–D215 (2009).
- 1026 40. Petersen, T. N., Brunak, S., von Heijne, G. & Nielsen, H. SignalP 4.0: discriminating signal  
1027 peptides from transmembrane regions. *Nature Methods* **8**, 785–786 (2011).
- 1028 41. Krogh, A., Larsson, B., von Heijne, G. & Sonnhammer, E. L. L. Predicting transmembrane protein  
1029 topology with a hidden markov model: application to complete genomes. *Journal of Molecular*  
1030 *Biology* **305**, 567–580 (2001).

- 1031 42. Park, J. *et al.* FTFD: an informatics pipeline supporting phylogenomic analysis of fungal  
1032 transcription factors. *Bioinformatics* **24**, 1024–1025 (2008).
- 1033 43. Rawlings, N. D., Waller, M., Barrett, A. J. & Bateman, A. *MEROPS* : the database of proteolytic  
1034 enzymes, their substrates and inhibitors. *Nucleic Acids Research* **42**, D503–D509 (2014).
- 1035 44. Khaldi, N. *et al.* SMURF: Genomic mapping of fungal secondary metabolite clusters. *Fungal*  
1036 *genetics and biology : FG & B* **47**, 736–41 (2010).
- 1037 45. Zhang, H. *et al.* DbCAN2: A meta server for automated carbohydrate-active enzyme annotation.  
1038 *Nucleic Acids Research* **46**, W95–W101 (2018).
- 1039 46. Kurtz, S. *et al.* Versatile and open software for comparing large genomes. *Genome Biology* **5**,  
1040 R12 (2004).
- 1041 47. Bushnell, B. BMap. <https://sourceforge.net/projects/bbmap/> (2019).
- 1042 48. Kim, D., Langmead, B. & Salzberg, S. L. HISAT: a fast spliced aligner with low memory  
1043 requirements. *Nature Methods* **12**, 357–360 (2015).
- 1044 49. Trapnell, C. *et al.* Transcript assembly and quantification by RNA-Seq reveals unannotated  
1045 transcripts and isoform switching during cell differentiation. *Nature Biotechnology* **28**, 511–  
1046 515 (2010).
- 1047 50. Roberts, A., Trapnell, C., Donaghey, J., Rinn, J. L. & Pachter, L. Improving RNA-Seq expression  
1048 estimates by correcting for fragment bias. *Genome Biology* **12**, R22 (2011).
- 1049 51. Katoh, K. & Standley, D. M. MAFFT Multiple Sequence Alignment Software Version 7:  
1050 Improvements in Performance and Usability. *Molecular Biology and Evolution* **30**, 772–780  
1051 (2013).
- 1052 52. Price, M. N., Dehal, P. S. & Arkin, A. P. FastTree 2 – Approximately Maximum-Likelihood Trees  
1053 for Large Alignments. *PLoS ONE* **5**, e9490 (2010).
- 1054 53. Simão, F. A., Waterhouse, R. M., Ioannidis, P., Kriventseva, E. v. & Zdobnov, E. M. BUSCO:  
1055 assessing genome assembly and annotation completeness with single-copy orthologs.  
1056 *Bioinformatics* **31**, 3210–3212 (2015).
- 1057 54. Talavera, G., Castresana, J., Kjer, K., Page, R. & Sullivan, J. Improvement of Phylogenies after  
1058 Removing Divergent and Ambiguously Aligned Blocks from Protein Sequence Alignments.  
1059 *Systematic Biology* **56**, 564–577 (2007).
- 1060 55. Huerta-Cepas, J., Serra, F. & Bork, P. ETE 3: Reconstruction, Analysis, and Visualization of  
1061 Phylogenomic Data. *Molecular Biology and Evolution* **33**, 1635–1638 (2016).
- 1062 56. Xiao, Z., Storms, R. & Tsang, A. Microplate-based filter paper assay to measure total cellulase  
1063 activity. *Biotechnology and Bioengineering* **88**, 832–837 (2004).
- 1064 57. Soyer, J. L. *et al.* Chromatin analyses of *Zyoseptoria tritici*: Methods for chromatin  
1065 immunoprecipitation followed by high-throughput sequencing (ChIP-seq). *Fungal Genetics and*  
1066 *Biology* **79**, 63–70 (2015).
- 1067 58. Johnson, D. S., Mortazavi, A., Myers, R. M. & Wold, B. Genome-Wide Mapping of in Vivo  
1068 Protein-DNA Interactions. *Science* **316**, 1497 LP – 1502 (2007).
- 1069 59. Langmead, B. & Salzberg, S. L. Fast gapped-read alignment with Bowtie 2. *Nature Methods* **9**,  
1070 357–359 (2012).
- 1071 60. Li, H. *et al.* The Sequence Alignment/Map format and SAMtools. *Bioinformatics* **25**, 2078–2079  
1072 (2009).
- 1073 61. Feng, J., Liu, T., Qin, B., Zhang, Y. & Liu, X. S. Identifying ChIP-seq enrichment using MACS.  
1074 *Nature Protocols* **7**, 1728–1740 (2012).
- 1075 62. Bailey, T. L. *et al.* MEME Suite: Tools for motif discovery and searching. *Nucleic Acids Research*  
1076 **37**, W202–W208 (2009).
- 1077 63. Shaner, N. C. *et al.* Improved monomeric red, orange and yellow fluorescent proteins derived  
1078 from *Discosoma* sp. red fluorescent protein. *Nature Biotechnology* **22**, 1567–1572 (2004).
- 1079 64. Ohm, R. A., Aerts, D., Wösten, H. A. B. & Lugones, L. G. The blue light receptor complex WC-  
1080 1/2 of *Schizophyllum commune* is involved in mushroom formation and protection against  
1081 phototoxicity. *Environmental Microbiology* **15**, 943–955 (2013).



- 1082 65. Scholtmeijer, K. *et al.* Production of (+)-valencene in the mushroom-forming fungus *S.*  
1083 *commune*. *Applied Microbiology and Biotechnology* **98**, 5059–5068 (2014).
- 1084 66. Ohm, R. A. *et al.* Diverse Lifestyles and Strategies of Plant Pathogenesis Encoded in the  
1085 Genomes of Eighteen Dothideomycetes Fungi. *PLoS Pathogens* **8**, e1003037 (2012).
- 1086 67. Traven, A., Jelacic, B. & Sopta, M. Yeast Gal4: a transcriptional paradigm revisited. *EMBO reports*  
1087 **7**, 496–499 (2006).
- 1088 68. van Peij, N. N. M. E., Visser, J. & de Graaff, L. H. Isolation and analysis of *xln R*, encoding a  
1089 transcriptional activator co-ordinating xylanolytic expression in *Aspergillus niger*. *Molecular*  
1090 *Microbiology* **27**, 131–142 (1998).
- 1091 69. Villares, A. *et al.* Lytic polysaccharide monooxygenases disrupt the cellulose fibers structure.  
1092 *Scientific Reports* **7**, 40262 (2017).
- 1093 70. Henrissat, B. & Davies, G. Structural and sequence-based classification of glycoside hydrolases.  
1094 *Current Opinion in Structural Biology* **7**, 637–644 (1997).
- 1095 71. Ohm, R. A., de Jong, J. F., de Bekker, C., Wösten, H. A. B. & Lugones, L. G. Transcription factor  
1096 genes of *Schizophyllum commune* involved in regulation of mushroom formation. *Molecular*  
1097 *Microbiology* **81**, 1433–1445 (2011).
- 1098 72. Baranova, M. A. *et al.* Extraordinary Genetic Diversity in a Wood Decay Mushroom. *Molecular*  
1099 *Biology and Evolution* **32**, 2775–2783 (2015).
- 1100 73. Morin, E. *et al.* Genome sequence of the button mushroom *Agaricus bisporus* reveals  
1101 mechanisms governing adaptation to a humic-rich ecological niche. *Proceedings of the*  
1102 *National Academy of Sciences* **109**, 17501–17506 (2012).
- 1103 74. Daly, P. *et al.* Glucose-mediated repression of plant biomass utilization in the white-rot fungus  
1104 *Dichomitus squalens*. *Applied and Environmental Microbiology* **85**, (2019).
- 1105 75. Steffens, E. K., Becker, K., Krevet, S., Teichert, I. & Kück, U. Transcription factor PRO1 targets  
1106 genes encoding conserved components of fungal developmental signaling pathways.  
1107 *Molecular Microbiology* **102**, 792–809 (2016).
- 1108 76. Kong, Q. *et al.* Identification of AflR Binding Sites in the Genome of *Aspergillus flavus* by ChIP-  
1109 Seq. *Journal of Fungi* **6**, 52 (2020).
- 1110 77. de Castro, P. A. *et al.* ChIP-seq reveals a role for CrzA in the *Aspergillus fumigatus* high-  
1111 osmolarity glycerol response (HOG) signalling pathway. *Molecular Microbiology* **94**, 655–674  
1112 (2014).
- 1113 78. Fan, G. *et al.* FgHtf1 Regulates Global Gene Expression towards Aerial Mycelium and  
1114 Conidiophore Formation in the Cereal Fungal Pathogen *Fusarium graminearum*. *Applied and*  
1115 *Environmental Microbiology* **86**, e03024-19 (2020).
- 1116 79. Pelkmans, J. F. *et al.* Transcription factors of *Schizophyllum commune* involved in mushroom  
1117 formation and modulation of vegetative growth. *Scientific Reports* **7**, 1–11 (2017).
- 1118 80. Schoch, C. L. *et al.* NCBI Taxonomy: A comprehensive update on curation, resources and tools.  
1119 *Database* vol. 2020 (2020).
- 1120
